1  
2 **Comprehensive preclinical evaluation of human-derived anti-poly-GA antibodies**  
3 **in cellular and animal models of C9ORF72 disease**  
4

5 Melanie Jambeau<sup>1,2,3,#</sup>, Kevin D. Meyer<sup>4,8,#</sup>, Marian Hruska-Plochan<sup>3,#</sup>, Ricardos Tabet<sup>1,2</sup>,  
6 Chao-Zong Lee<sup>1,2</sup>, Ananya Ray-Soni<sup>1,2</sup>, Corey Aguilar<sup>1,2</sup>, Kitty Savage<sup>1,2</sup>, Nibha Mishra<sup>1,2</sup>,  
7 Nicole Cavegn<sup>4</sup>, Petra Borter<sup>4</sup>, Chun-Chia Lin<sup>1</sup>, Karen Jansen-West<sup>5</sup>, Jay Jiang<sup>6</sup>, Fernande  
8 Freyermuth<sup>1,2</sup>, Nan Li<sup>1,2</sup>, Pierre De Rossi<sup>3</sup>, Manuela Pérez-Berlanga<sup>3</sup>, Xin Jiang<sup>1,2</sup>, Lilian M.  
9 Daughrity<sup>5</sup>, Joao Pereira<sup>1,2</sup>, Sarav Narayanan<sup>7</sup>, Yuanzheng Gu<sup>7</sup>, Shekhar Dhokai<sup>7</sup>, Isin  
10 Dalkilic-Liddle<sup>7</sup>, Zuzanna Maniecka<sup>3</sup>, Julien Weber<sup>3</sup>, Michael Workman<sup>1</sup>, Melissa  
11 McAlonis-Downes<sup>6</sup>, Eugene Berezovski<sup>1,2</sup>, Yong-Jie Zhang<sup>5</sup>, James Berry<sup>1</sup>, Brian J.  
12 Wainger<sup>1,2</sup>, Mark W. Kankel<sup>7</sup>, Mia Rushe<sup>7</sup>, Christoph Hock<sup>4,8</sup>, Roger M. Nitsch<sup>4,8</sup>, Don W.  
13 Cleveland<sup>6</sup>, Leonard Petrucelli<sup>5</sup>, Tania Gendron<sup>5</sup>, Fabio Montrasio<sup>4</sup>, Jan Grimm<sup>4,\*</sup>, Magdalini  
14 Polymenidou<sup>3,\*</sup>, Clotilde Lagier-Tourenne<sup>1,2,\*</sup>

15 <sup>1</sup> Department of Neurology, The Sean M. Healey and AMG Center for ALS at Mass General,  
16 Massachusetts General Hospital and Harvard Medical School, Boston, MA 02114, USA.

17 <sup>2</sup> Broad Institute of Harvard and MIT, Cambridge, MA 02142, USA.

18 <sup>3</sup> Department of Quantitative Biomedicine, University of Zurich, Winterthurerstrasse 190,  
19 CH-8057 Zurich, Switzerland.

20 <sup>4</sup> Neurimmune AG, Wagistrasse 18, CH-8952 Schlieren, Switzerland.

21 <sup>5</sup> Department of Neuroscience, Mayo Clinic, Jacksonville, FL 32224, USA.

22 <sup>6</sup> Ludwig Institute for Cancer Research, University of California San Diego, La Jolla, CA  
23 92093.

24 <sup>7</sup> Biogen, Cambridge, Massachusetts, 02142, USA.

25 <sup>8</sup> Institute for Regenerative Medicine, University of Zurich, Wagistrasse 12, CH-8952  
26 Schlieren, Switzerland.

27 <sup>#</sup> These authors contributed equally.

28 <sup>\*</sup> Corresponding authors  
29

30 Emails for correspondence: [jan.grimm@neurimmune.com](mailto:jan.grimm@neurimmune.com) or

31 [magdalini.polymenidou@uzh.ch](mailto:magdalini.polymenidou@uzh.ch) or [clagier-tourenne@mgh.harvard.edu](mailto:clagier-tourenne@mgh.harvard.edu)

32

33 **Abstract**

34 Hexanucleotide G<sub>4</sub>C<sub>2</sub> repeat expansions in the *C9ORF72* gene are the most common genetic  
35 cause of amyotrophic lateral sclerosis (ALS) and frontotemporal dementia (FTD). Dipeptide  
36 repeat proteins (DPRs) generated by translation of repeat-containing RNAs show toxic  
37 effects *in vivo* as well as *in vitro* and are key targets for therapeutic intervention. We  
38 generated human antibodies that bind DPRs with high affinity and specificity. Anti-GA  
39 antibodies engaged extra- and intracellular poly-GA and reduced aggregate formation in a  
40 poly-GA over-expressing human cell line. However, antibody treatment in human neuronal  
41 cultures synthesizing exogenous poly-GA resulted in the formation of large extracellular  
42 immune complexes and did not affect accumulation of intracellular poly-GA aggregates.  
43 Treatment with antibodies was also shown to directly alter the morphological and  
44 biochemical properties of poly-GA and to shift poly-GA/antibody complexes to more rapidly  
45 sedimenting ones. These alterations were not observed with poly-GP and have important  
46 implications for accurate measurement of poly-GA levels including the need to evaluate all  
47 centrifugation fractions and disrupt the interaction between treatment antibodies and poly-GA  
48 by denaturation. Targeting poly-GA and poly-GP in two mouse models expressing G<sub>4</sub>C<sub>2</sub>  
49 repeats by systemic antibody delivery for up to 16 months was well-tolerated and led to  
50 measurable brain penetration of antibodies. Long term treatment with anti-GA antibodies  
51 produced improvement in an open field movement test in aged *C9ORF72*<sup>450</sup> mice. However,  
52 chronic administration of anti-GA antibodies in AAV-(G<sub>4</sub>C<sub>2</sub>)<sub>149</sub> mice was associated with  
53 increased levels of poly-GA detected by immunoassay and did not significantly reduce poly-  
54 GA aggregates or alleviate disease progression in this model.

55

56

57

58 **Significance**

59 Immunotherapy has been proposed for neurodegenerative disorders including Alzheimer's or  
60 Parkinson's diseases. Recent reports using antibodies against poly-GA or active  
61 immunization suggested similar immunotherapy in ALS/FTD caused by repeat expansion in  
62 the C9ORF72 gene (1, 2). Here, we systematically characterized human antibodies against  
63 multiple DPR species and tested the biological effects of antibodies targeting poly-GA in  
64 different cellular and mouse models. Target engagement was shown in three independent  
65 cellular models. Anti-GA antibodies reduced the number of intracellular poly-GA aggregates  
66 in human T98G cells but not in cultured human neurons. Whereas chronic anti-GA treatment  
67 in BAC C9ORF72<sup>450</sup> mice did not impact poly-GA levels and modestly improved one  
68 behavioral phenotype, poly-GA levels detected by immunoassays were increased and disease  
69 progression was unaltered in AAV-(G<sub>4</sub>C<sub>2</sub>)<sub>149</sub> mice.

70

71

## 72 **Introduction**

73 Hexanucleotide repeat expansions ( $G_4C_2$ ) in the *C9ORF72* gene are the most frequent genetic  
74 cause of amyotrophic lateral sclerosis (ALS) and frontotemporal dementia (FTD) (3, 4).  
75 Proposed disease mechanisms include *C9ORF72* haploinsufficiency, repeat-RNA toxicity  
76 and protein toxicity. Though the relative contribution of each mechanism is not fully  
77 understood (5), there is mounting evidence that accumulation of dipeptide repeat proteins  
78 (DPRs), generated by repeat-associated non-ATG (RAN) translation across the *C9ORF72*  
79 expansion, plays a crucial role in neurodegeneration (6-11). DPRs are translated from both  
80 sense (poly-GA, poly-GR and poly-GP) and antisense (poly-PR, poly-PA and poly-GP)  
81 repeat-containing RNAs, and represent the major component of p62-positive, TDP-43-  
82 negative aggregates in the central nervous system of *C9ORF72* ALS/FTD patients (12-14).  
83 Moreover, several *in vivo* and *in vitro* studies support direct toxic effects of arginine-rich  
84 DPR proteins poly-PR and poly-GR (15-19), as well as the aggregation-prone and most  
85 abundant DPR product, poly-GA (20-22). A recent study directly comparing congenic mice  
86 expressing either poly-GA or poly-PR indicates that poly-GA is considerably more toxic,  
87 leading to TDP-43 abnormalities and neuronal loss (23), highlighting its suitability as a  
88 therapeutic target.

89 Passive immunotherapy using humanized or fully human antibodies targeting aberrantly  
90 produced or misfolded proteins has been investigated in several pre-clinical and clinical  
91 settings for the treatment of neurodegenerative disorders (24, 25). The most advanced  
92 programs have targeted extracellular amyloid- $\beta$  plaques in mouse models and patients with  
93 Alzheimer's disease (26, 27). Targeting intracellular misfolded proteins, including tau and  $\alpha$ -  
94 synuclein, has also shown beneficial effects on pathology and behavioral abnormalities in  
95 multiple mouse models of Alzheimer's (28, 29) or Parkinson's diseases (30). Recently,  
96 human-derived antibodies targeting misfolded SOD1 were reported to delay disease onset

97 and increase survival in independent ALS-linked SOD1 mutant mouse models (31). Another  
98 study explored the potential of immunotherapy for treating C9ORF72 ALS/FTD by using a  
99 mouse-derived antibody against poly-GA in cultured cells (32), and a potential beneficial  
100 effect of poly-GA human-derived antibodies was reported in C9ORF72 BAC transgenic mice  
101 expressing 500 repeats (1). Most recently, the effect of active immunization against poly-GA  
102 (2) was assessed in a mouse model overexpressing poly-GA fused with the cyan fluorescent  
103 protein ((GA)<sub>149</sub>-CFP; ). Reduction in poly-GA accumulation, neuroinflammation and TDP-  
104 43 mislocalization was observed in (GA)<sub>149</sub>-CFP mice immunized with ovalbumin-(GA)<sub>10</sub>  
105 conjugates (2). Several non-exclusive mechanisms have been proposed for antibody-  
106 mediated neutralization of intra-cellular aggregates. In particular, antibodies to tau or  $\alpha$ -  
107 synuclein may influence disease progression by inhibiting cell-to-cell propagation of toxic  
108 proteins (29, 33), a mechanism proposed also for C9ORF72 DPRs (22, 32, 34). Moreover,  
109 several studies suggest that antibodies are internalized by neuronal cells (35, 36), where they  
110 may capture accumulated protein aggregates and facilitate their degradation.

111 Here, we systematically characterized 11 human anti-DPR antibodies generated by immune  
112 repertoire analyses of healthy elderly donors, and tested poly-GA antibodies in multiple cell  
113 lines, including human neuronal cultures and two C9ORF72 mouse models. Poly-GA-  
114 specific antibodies entered cultured neurons and colocalized with their target in intracellular  
115 vesicles. Moreover, long-term antibody treatment of human neurons expressing poly-GA  
116 resulted in capturing of extracellular poly-GA and lead to the formation of extracellular  
117 antibody-poly-GA complexes. In transgenic mice expressing the *C9ORF72* gene containing  
118 450 G<sub>4</sub>C<sub>2</sub> repeats (C9<sup>450</sup>) or in mice expressing 149 G<sub>4</sub>C<sub>2</sub> repeats within the central nervous  
119 system by means of adeno-associated virus (AAV-G<sub>4</sub>C<sub>2</sub>) (37, 38), antibodies were shown to  
120 cross the blood-brain barrier without obvious adverse effects upon long term chronic  
121 administration. However, in the (AAV-G<sub>4</sub>C<sub>2</sub>)<sub>149</sub> mice antibody treatment was not efficient in

122 clearing poly-GA aggregates and was associated with increased poly-GA levels measured by  
123 immunoassay. While an improvement was observed in one behavioral assay in C9<sup>450</sup> mice,  
124 treatment was not associated with alleviation of disease progression in (AAV-G<sub>4</sub>C<sub>2</sub>)<sub>149</sub> mice.

## 125 **Results**

### 126 **Antibody generation and affinity determination**

127 Human monoclonal antibodies targeting the five *C9ORF72* DPRs were generated by  
128 screening memory B-cell libraries from healthy elderly subjects, an approach previously used  
129 to identify potent antibodies recognizing protein aggregates that include amyloid- $\beta$ , SOD1 or  
130  $\alpha$ -synuclein (25). Eleven antibodies with high affinity to one or multiple DPRs were  
131 characterized by ELISA (*SI Appendix, Table S1, Fig. S1A*), biolayer interferometry (*SI*  
132 *Appendix, Table S1, Fig. S1B*) and immunostaining (*SI Appendix, Table S1, Fig. S2-6*).  
133 Four poly-GA-specific antibodies, designated  $\alpha$ -GA<sub>1-4</sub>, were identified with nanomolar EC<sub>50</sub>  
134 constants (0.2-0.3 nM) (*SI Appendix, Table S1, Fig. S1A*). Kinetic analyses by biolayer  
135 interferometry revealed that the four  $\alpha$ -GA antibodies had comparable association rate  
136 constants ( $k_a$ ) to GA<sub>15</sub> peptides.  $\alpha$ -GA<sub>2-4</sub> showed comparably low dissociation rates ( $k_d$ ),  
137 whereas faster target dissociation was observed for  $\alpha$ -GA<sub>1</sub> (*SI Appendix, Table S1, Fig. S1B*).  
138 Antibody  $\alpha$ -GP<sub>1</sub> displayed high affinity binding to poly-GP and a 26-fold lower affinity to  
139 poly-GA (*SI Appendix, Table S1, Fig. S1A*). By screening against the arginine-rich DPR  
140 proteins, poly-GR and poly-PR, we further identified  $\alpha$ -PR<sub>2</sub>, which exclusively recognized  
141 poly-PR (EC<sub>50</sub> of 12.8 nM), as well as several antibody candidates targeting more than one  
142 DPR species,  $\alpha$ -PR<sub>1,3</sub> and  $\alpha$ -GR<sub>1</sub>. Two candidates with high affinity EC<sub>50</sub> binding (0.1-0.4  
143 nM) to poly-PA were identified, with  $\alpha$ -PA<sub>1</sub> specifically targeting poly-PA (*SI Appendix,*  
144 **Table S1, Fig. S1A**).

145 The four human anti-GA ( $\alpha$ -GA<sub>1-4</sub>) and the anti-GP ( $\alpha$ -GP<sub>1</sub>) antibodies specifically  
146 recognized aggregates in human brain tissues from ALS patients carrying pathogenic

147 expansions in the *C9ORF72* gene (*SI Appendix, Table S1, Fig. S2A and B*, upper panels) and  
148 in transgenic mice expressing 450 *C9ORF72* hexanucleotide repeats ( $C9^{450}$ ) (37) (*SI*  
149 *Appendix, Table S1, Fig. S2A and B*, lower panels). Antibodies targeting poly-GR, poly-PR  
150 and poly-PA ( $\alpha$ -GR<sub>1</sub>,  $\alpha$ -PR<sub>1-3</sub> and  $\alpha$ -PA<sub>1,2</sub>) failed to detect DPR aggregates following  
151 immunostaining of formalin-fixed human and mouse tissues (*SI Appendix, Table S1*).

152 To further test antibody specificity across all five DPRs, we transiently transfected motor  
153 neuron-like cells (NSC-34) with single DPR species with 50 repeats and tagged with the  
154 enhanced green fluorescent protein (GFP) (*SI Appendix, Fig. S2-6*). Immunofluorescence  
155 analysis revealed a predominantly cytoplasmic, diffuse distribution of GA<sub>50</sub>-GFP, GP<sub>47</sub>-GFP  
156 and PA<sub>50</sub>-GFP, with GA<sub>50</sub>-GFP also forming dense and bright aggregates. GR<sub>50</sub>-GFP  
157 accumulated either in the cytoplasm or in the nucleus and PR<sub>50</sub>-GFP localized in nuclei. All  
158 four human-derived  $\alpha$ -GA antibodies ( $\alpha$ -GA<sub>1-4</sub>) specifically recognized poly-GA, with no  
159 cross-reactivity to other DPR species (*SI Appendix, Table S1, Fig. S2 C and D, Fig. S3*).

160 Specificity of the  $\alpha$ -GA antibodies was confirmed by absence of signal in GFP-only  
161 transfected cells and in cells stained with secondary antibody only (*SI Appendix, Fig. S4A*).

162 In addition to displaying a strong, specific staining for poly-GP, antibody  $\alpha$ -GP<sub>1</sub> also showed  
163 a weak reactivity for poly-GA, consistent with its *in vitro* binding affinity (EC<sub>50</sub> values in *SI*  
164 *Appendix, Table S1*), as well as a faint non-specific nuclear staining (*SI Appendix, Fig. S4B*).

165 Two  $\alpha$ -PA antibodies,  $\alpha$ -PA<sub>1,2</sub>, specifically recognized poly-PA (*SI Appendix, Table S1, Fig.*  
166 *S5*), while antibodies  $\alpha$ -PR<sub>2,3</sub> detected poly-PR in the nucleus, particularly in nucleoli, but no  
167 other DPR species (*SI Appendix, Table S1, Fig. S6*). Since  $\alpha$ -GA and  $\alpha$ -GP reliably detected  
168 aggregates in  $C9^{450}$  mouse and *C9ORF72* ALS patient brain sections, we selected  $\alpha$ -GA<sub>1</sub>,  $\alpha$ -  
169 GA<sub>3</sub> and  $\alpha$ -GP<sub>1</sub> (or murine chimeric IgG2a derivatives of each: <sup>ch</sup> $\alpha$ -GA<sub>1</sub>, <sup>ch</sup> $\alpha$ -GA<sub>3</sub> and <sup>ch</sup> $\alpha$ -  
170 GP<sub>1</sub>) to test their ability to impact poly-GA and poly-GP accumulation *in vitro* and *in vivo*.

171 **Antibody uptake and colocalization with poly-GA in living cells**

172 To determine if living cells internalize anti-GA antibodies, human neuroblastoma SH-SY5Y  
173 cells were transfected to express either a GFP control construct or GA<sub>50</sub>-GFP and incubated  
174 in media containing antibodies  $\alpha$ -GA<sub>1</sub>,  $\alpha$ -GA<sub>3</sub> or an IgG isotype control (50 nM, 72 hrs). A  
175 strong antibody signal was detected in SH-SY5Y cells expressing GA<sub>50</sub>-GFP and treated with  
176  $\alpha$ -GA<sub>1</sub> or  $\alpha$ -GA<sub>3</sub> compared to cells incubated with an IgG isotype control or cells expressing  
177 GFP only (**Fig. 1A** and **B**, *SI Appendix*, **Fig. S7 A** and **B**). This result is consistent with the  
178 presence of poly-GA within cells enhancing retention of internalized  $\alpha$ -GA human  
179 antibodies. Automated quantification confirmed colocalization between GA<sub>50</sub>-GFP and  $\alpha$ -GA  
180 antibodies. Indeed, 43 % and 55 % of GA<sub>50</sub>-GFP area colocalized with  $\alpha$ -GA<sub>1</sub> and  $\alpha$ -GA<sub>3</sub>,  
181 respectively, while less than 2 % of the GFP-positive area colocalized with these antibodies  
182 ( $p < 0.001$ ; **Fig. 1B**). Importantly, GA<sub>50</sub>-GFP did not colocalize with the IgG isotype control  
183 ( $p < 0.001$ ; **Fig. 1B**). Similar results were obtained when quantifying the total area of  
184 antibodies that colocalized with GFP versus GA<sub>50</sub>-GFP, with approximately 40 % of the  $\alpha$ -  
185 GA<sub>1</sub> and  $\alpha$ -GA<sub>3</sub> signal overlapping with GA<sub>50</sub>-GFP, while less than 8 % overlapped with GFP  
186 ( $p < 0.001$ ; *SI Appendix*, **Fig. S7B**).

187 A flow cytometry-based approach using directly labeled human antibodies (**Fig. 1C**) was  
188 used to quantify antibody uptake by SH-SY5Y cells transfected to express HA-GA<sub>50</sub> or  
189 exposed to transfection reagents without any plasmid (mock transfected). After incubation  
190 with fluorescently labeled  $\alpha$ -GA<sub>1</sub>,  $\alpha$ -GA<sub>3</sub> or IgG isotype for 24 or 48 hrs, cells were treated  
191 with trypsin and trypan blue before analysis by flow cytometry to ensure that the detected  
192 fluorescence corresponds to internalized antibodies (36) (**Fig. 1 C-E** and *SI Appendix*, **Fig.**  
193 **S7C-E**). As seen before with confocal microscopy (**Fig. 1A** and **B** and *SI Appendix*, **Fig. S7 A**  
194 and **B**), accumulation of poly-GA increased the intracellular  $\alpha$ -GA<sub>1</sub> and  $\alpha$ -GA<sub>3</sub> antibody  
195 signal within 24 (*SI Appendix*, **Fig. S7C**) or 48 hrs (**Fig. 1 D** and **E**) compared to cells not



196 expressing poly-GA ( $p < 0.001$ ; **Fig 1E** and *SI Appendix, Fig. S7C-E*). Only 2-6 % of the  
197 mock transfected (**Fig. 1E, SI Appendix, Fig. S7C**) or the non-transfected cells (*SI Appendix,*  
198 **Fig. S7 D and E**) had detectable internalized antibodies while 15 to 22 % of poly-GA-  
199 transfected cells had internalized  $\alpha$ -GA<sub>1</sub> and  $\alpha$ -GA<sub>3</sub> antibodies. Notably, internalization of  $\alpha$ -  
200 GA<sub>3</sub> was more efficient than  $\alpha$ -GA<sub>1</sub> with a trend already observed after 24 hrs of treatment ( $p$   
201 = 0.055; *SI Appendix, Fig. S7C*) and a significant difference after 48 hrs ( $p < 0.001$ ; **Fig. 1E**).  
202 Detectable levels of internalized IgG isotype control were found in less than 9 % of the cells  
203 in all conditions.

204 To corroborate these findings, we used an independent, stable and inducible T98G  
205 glioblastoma cellular model overexpressing GA<sub>161</sub>-GFP. Following treatment with 100 nM  $\alpha$ -  
206 GA<sub>1</sub> or an IgG isotype control antibody for 72 hrs, cells were stained with anti-human IgG.  
207 Image analysis demonstrated that  $\alpha$ -GA<sub>1</sub> colocalized with poly-GA aggregates within T98G  
208 cells, while isotype control was not observed within cells (**Fig. 1F**). Treatment of T98G cells  
209 with  $\alpha$ -GA<sub>1</sub> reduced the number of aggregates per cell by 29 % (**Fig. 1G**) and reduced the  
210 volume of poly-GA aggregates per cell by 39 % (**Fig. 1H**).

### 211 **Antibody uptake and colocalization with poly-GA in human neurons**

212 The enhancement of antibody internalization or retention in presence of poly-GA was also  
213 seen in cultured human neurons. Neural stem cells (NSCs) were differentiated for 6 weeks  
214 into a functional neural network containing neurons and astrocytes (39), and treated for  
215 72 hrs with <sup>ch</sup> $\alpha$ -GA<sub>3</sub> added to the medium. High-magnification confocal images revealed that  
216 <sup>ch</sup> $\alpha$ -GA<sub>3</sub> was internalized by human neurons (*SI Appendix, Fig. S8A*, upper panels,  
217 arrowheads and inset) with no detectable signal in non-treated cells (*SI Appendix, Fig. S8A,*  
218 lower panels). Neurons were transduced with a lentivirus expressing doxycycline-inducible  
219 GA<sub>50</sub>-GFP and treated for 24 hrs with <sup>ch</sup> $\alpha$ -GA<sub>1</sub>, <sup>ch</sup> $\alpha$ -GA<sub>3</sub> or an IgG isotype control (**Fig. 2A**  
220 and *SI Appendix, Fig. S8B*). Both <sup>ch</sup> $\alpha$ -GA<sub>3</sub> and the control antibodies were detected as

221 extracellular clumps and internalized by GA<sub>50</sub>-GFP-expressing neurons at 72 hrs of  
222 treatment. While intracellular localization of <sup>ch</sup>α-GA<sub>3</sub> was observed in almost 100 % of GA<sub>50</sub>-  
223 GFP-expressing cells, the IgG isotype control antibody was rarely found accumulated  
224 intracellularly (18 %,  $p < 0.0001$ ; **Fig. 2 A and B**). In contrast with <sup>ch</sup>α-GA<sub>3</sub>, intracellular <sup>ch</sup>α-  
225 GA<sub>1</sub> was detected only after 21 days of treatment (*SI Appendix, Fig. S8B*). Three-dimensional  
226 reconstitution of confocal images of GA<sub>50</sub>-GFP-expressing human neurons treated with <sup>ch</sup>α-  
227 GA<sub>3</sub> revealed partial co-localization of GA<sub>50</sub>-GFP and <sup>ch</sup>α-GA<sub>3</sub> (*SI Appendix, Fig. S8C*).  
228 Notably, we observed an incomplete colocalization of <sup>ch</sup>α-GA antibodies with large round  
229 intracellular aggregates (*SI Appendix, Fig. S8B*, inset), suggesting that the antibodies may not  
230 penetrate the dense core of these structures.

231 To understand the intracellular compartment of the observed antibody-antigen interaction, we  
232 performed co-immunostaining of GA<sub>50</sub>-GFP, <sup>ch</sup>α-GA<sub>3</sub>, and either RAB7 (endosomes) or  
233 LAMP1 (lysosomes). This analysis revealed that GA<sub>50</sub>-GFP and antibody partially  
234 colocalized with each of these markers (**Fig. 2C**), supporting that intracellular interaction  
235 between poly-GA and externally delivered antibodies occurred within trafficking vesicles. Of  
236 note, the presence of the α-GA antibody was not required for the localization of GA<sub>50</sub>-GFP  
237 into endosomal vesicles (**Fig. 2C**, lower panel). To determine if the presence of intracellular  
238 antibody facilitated the engulfment of GA<sub>50</sub>-GFP in intracellular vesicles, we quantified the  
239 colocalization between approximately 1400 GA<sub>50</sub>-GFP particles and each of these markers  
240 using super resolution microscopy (**Fig. 2 D and E**). Antibody treatment with <sup>ch</sup>α-GA<sub>3</sub>  
241 showed a trend ( $p = 0.08$ ) in favoring the colocalization of GA<sub>50</sub>-GFP with late endosomes  
242 compared to treatment with the IgG isotype control. Indeed 22 % of GA<sub>50</sub>-GFP vesicles were  
243 colocalized with Rab7 in cells treated with <sup>ch</sup>α-GA<sub>3</sub> compared to 12.7 % in cells treated with  
244 the IgG isotype control (**Fig. 2E**). Localization of GA<sub>50</sub>-GFP in lysosomes was not affected  
245 ( $p = 0.54$ ) (**Fig. 2E**).

246 Taken together, these data demonstrate that  $\alpha$ -GA antibodies entered cells and engaged  
247 intracellular poly-GA, the presence of which enhanced antibody uptake or intracellular  
248 retention. Antibody and GA<sub>50</sub>-GFP were found in similar intracellular vesicles, with no  
249 significant changes of GA<sub>50</sub>-GFP localization induced by <sup>ch</sup> $\alpha$ -GA<sub>3</sub> antibody treatment.

250 **Long-term antibody treatment in human neurons modulates poly-GA solubility by**  
251 **forming extracellular immune complexes**

252 To determine whether chronic antibody treatment can modulate the aggregation state of poly-  
253 GA or trigger the aggregate clearance, we added <sup>ch</sup> $\alpha$ -GA<sub>1</sub>, <sup>ch</sup> $\alpha$ -GA<sub>3</sub> or IgG isotype control  
254 antibodies to the culture medium of human neural culture transduced with inducible GA<sub>50</sub>-  
255 GFP. After 3, 7 or 21 days of poly-GA induction and simultaneous antibody treatment, cells  
256 were either fixed for immunofluorescence imaging followed by aggregate count or lysed for  
257 biochemical analysis (**Fig. 3A**). Without antibody addition, only a faint, diffused or fine  
258 punctate GA<sub>50</sub>-GFP signal was detectable in the cytoplasm 3 days after induction (*SI*  
259 *Appendix, Fig. S9A*). By 7 days, GA<sub>50</sub>-GFP either formed round and bright particles  
260 reminiscent of aggregates, or less bright and irregularly shaped structures resembling pre-  
261 inclusions (**Fig. 3B, SI Appendix, Fig. S9A**). At 21 days, both aggregates and pre-inclusions  
262 increased in number (**Fig 3C, SI Appendix, Fig. S9A**). Quantification confirmed the time-  
263 dependent increase of GA<sub>50</sub>-GFP intracellular inclusions (**Fig 3C, gray bars**), which remained  
264 unaffected by the addition of <sup>ch</sup> $\alpha$ -GA<sub>1</sub> (**Fig. 3C**), or <sup>ch</sup> $\alpha$ -GA<sub>3</sub> (*SI Appendix, Fig. S9B*) into the  
265 cell culture medium.

266 Interestingly, the addition of <sup>ch</sup> $\alpha$ -GA<sub>1</sub> (**Fig. 3B and D**) and <sup>ch</sup> $\alpha$ -GA<sub>3</sub> antibodies (*SI Appendix,*  
267 **Fig. S9C**), but not of the IgG isotype control (**Fig. 3B and D**), markedly increased the  
268 presence of extracellular bright, large, irregularly shaped GA<sub>50</sub>-GFP complexes (**Fig. 3B**)  
269 which colocalized with <sup>ch</sup> $\alpha$ -GA<sub>1</sub> (**Fig. 4E**) or <sup>ch</sup> $\alpha$ -GA<sub>3</sub> (*SI Appendix, Fig. S8D*). Extracellular  
270 antibody-poly-GA complexes were stable for at least 7 days after doxycycline was removed

271 to suppress new GA<sub>50</sub>-GFP production (**Fig. 3D**). The formation of extracellular immune  
272 complexes was consistent with natural release of poly-GA from cells into the medium (34),  
273 as cell counting did not reveal poly-GA or antibody-mediated cell death (**Fig. 3F**; *SI*  
274 *Appendix, Fig. S9E*).

275 Biochemical analysis showed that the levels of soluble poly-GA were not different across  
276 experimental groups (*SI Appendix, Fig. S9F*). On the other hand, poly-GA isolated by  
277 detergent solubilization followed by centrifugation (40) and quantified with a filter-  
278 retardation assay were markedly increased at all time points in neural cultures incubated with  
279 <sup>ch</sup>α-GA<sub>1</sub> (**Fig. 3G and H**) or <sup>ch</sup>α-GA<sub>3</sub> (*SI Appendix, Fig. S9G and H*) compared with control  
280 samples, supporting the presence of poly-GA/antibody immune complexes.

281 To test whether binding of α-GA antibodies to poly-GA aggregates alter their morphology,  
282 we first developed a biochemical method for the purification of GA<sub>50</sub>-GFP aggregates from  
283 transiently transfected HEK293T cells. Extracted GA<sub>50</sub>-GFP aggregates showed remarkable  
284 purity and homogeneity, permitting their characterization via scanning electron microscopy  
285 (SEM) (**Fig. 3I**). GA<sub>50</sub>-GFP-expressing HEK293T cellular extracts were incubated with  
286 human Alexa Fluor 647-labelled α-GA<sub>1</sub>, α-GA<sub>3</sub> or IgG isotype control antibodies, followed  
287 by poly-GA aggregate purification, brightfield, immunofluorescence and SEM imaging to  
288 eventually carry out correlative light-electron microscopy (CLEM) (**Fig. S10A-N**). We then  
289 assessed and quantified the direct effects of antibody binding on the formation of poly-GA  
290 aggregates. Untreated or IgG isotype control-treated poly-GA aggregates appeared  
291 consistently spherical and with regular surface pores (**Fig. 3K**). In contrast, binding of either  
292 α-GA<sub>1</sub> or α-GA<sub>3</sub> antibodies to poly-GA aggregates altered their morphology and yielded  
293 aggregates with a smoother surface (**Fig. 3K-L**). Antibody binding had no effect on the size  
294 of the poly-GA spheres, which ranged roughly between 10 and 40 μm<sup>2</sup> (**Fig. 3M**). These  
295 results indicate that antibody binding directly alters the biochemical and potentially

296 biological properties of GA<sub>50</sub>-GFP aggregates, which may affect their toxicity and spreading  
297 potential.

298 Overall, antibodies against poly-GA engaged extracellular GA<sub>50</sub>-GFP into detectable poly-  
299 GA/antibody immune complexes, without affecting soluble GA<sub>50</sub>-GFP levels or poly-GA  
300 intracellular structures, while they altered GA<sub>50</sub>-GFP aggregate formation and morphology in  
301 cellular extracts, potentially via stabilization of the poly-GA molecules within the aggregates.

### 302 **Pharmacokinetics and brain penetration of human-derived antibodies peripherally** 303 **administered in C9<sup>450</sup> mice**

304 To test the therapeutic potential of antibodies with high affinity and specificity against poly-  
305 GA and poly-GP, three antibodies were selected for investigation in two different G<sub>4</sub>C<sub>2</sub>-  
306 expressing mouse models. The pharmacokinetic and antibody brain penetration properties of  
307 human-derived  $\alpha$ -GA<sub>1</sub>,  $\alpha$ -GA<sub>3</sub> or  $\alpha$ -GP<sub>1</sub> antibodies were determined after a single  
308 intraperitoneal (i.p.) injection of 30 mg/kg of antibodies to transgenic mice expressing a  
309 human bacterial artificial chromosome (BAC) with 450 G<sub>4</sub>C<sub>2</sub> repeats (C9<sup>450</sup>) (37) (*SI*  
310 *Appendix, Fig. S11A-D*). The maximum concentrations ( $C_{\max}$ ) in the plasma were 565±30,  
311 338±24 and 587±54 µg/ml with estimated terminal elimination half-lives ( $t_{1/2}$ ) of 10.8, 11.0  
312 and 7.2 days for  $\alpha$ -GA<sub>1</sub>,  $\alpha$ -GA<sub>3</sub> and  $\alpha$ -GP<sub>1</sub>, respectively. The corresponding  $C_{\max}$  in the brain  
313 were 0.41±0.16, 0.12±0.07 and 0.28±0.09 µg/mg of total brain protein measured at 2 days  
314 post-injection. All antibodies were undetectable by three weeks post-administration. The ratio  
315 of the brain drug concentration to the plasma concentration measured at 2 days post-injection  
316 was of 0.05-0.1 %, consistent with previous reports for systemically administered antibodies  
317 (41). Immunofluorescence using human-specific IgG secondary antibodies did not detect  $\alpha$ -  
318 GA<sub>1</sub>,  $\alpha$ -GA<sub>3</sub> and  $\alpha$ -GP<sub>1</sub> antibodies 10 days after a single i.p. injection in 20-month-old C9<sup>450</sup>  
319 mouse brains having accumulated poly-GA aggregates (*SI Appendix, Fig. S11E*).

320 **Chronic administration of human-derived antibodies modulates poly-GA solubility**  
321 **without significantly altering poly-GA levels in C9<sup>450</sup> mice**

322 To evaluate the effect of antibodies on the development of DPR pathology in mouse brain,  
323 antibodies were intraperitoneally injected in C9<sup>450</sup> mice from 3 to 19 months of age (**Fig. 4A**).  
324 To circumvent the mouse immune response towards the chronic administration of human  
325 antibodies we used murine IgG<sub>2a</sub> chimeric derivatives of the human antibodies. Chimeric  $\alpha$ -  
326 GA antibodies (<sup>ch</sup> $\alpha$ -GA<sub>1</sub>, <sup>ch</sup> $\alpha$ -GA<sub>3</sub>) and  $\alpha$ -GP antibody (<sup>ch</sup> $\alpha$ -GP<sub>1</sub>) were administered once a  
327 week at 30 mg/kg in C9<sup>450</sup> mice starting at 3 months of age (**Fig. 4A**). The poly-GA  
328 aggregate load detectable by immunohistochemistry in C9<sup>450</sup> mice was too low and variable  
329 in this cohort to be reliably quantified. Levels of soluble poly-GA and poly-GP were  
330 measured at 7 months of age by immunoassay after sonication of brain homogenates in the  
331 presence of 2 % SDS (37) (*SI Appendix, Fig. S12A*, fraction 1) from C9<sup>450</sup> mice expressing  
332 comparable levels of the transgene (*SI Appendix, Fig. S12B*). Insoluble fractions obtained by  
333 ultracentrifugation and resuspension of the corresponding pellet in 7 M Urea (*SI Appendix,*  
334 **Fig. S12A**, fraction 2) were measured using similar immunoassays. Soluble poly-GP did not  
335 significantly differ between treatment groups (*SI Appendix, Fig. S12C*). Poly-GA proteins,  
336 however, were not detectable in mice treated with <sup>ch</sup> $\alpha$ -GA<sub>1</sub> and <sup>ch</sup> $\alpha$ -GA<sub>3</sub> and were  
337 significantly reduced in mice treated with <sup>ch</sup> $\alpha$ -GP<sub>1</sub> (an antibody recognizing poly-GA with  
338 lower affinity; *SI Appendix, Fig. S1A* and **S4B**) compared to mice injected with saline only  
339 (*SI Appendix, Fig. S12D*). This observation suggests that  $\alpha$ -GA antibodies interfere with the  
340 detection of poly-GA in immunoassays that do not include denaturation of the samples, likely  
341 by masking of the epitopes by the injected antibody (**Fig. 4B**, left panel). In addition, while  
342 poly-GA was normally not detected in the urea-insoluble fraction from saline injected C9<sup>450</sup>  
343 mice (*SI Appendix, Fig. S12E*, C9<sup>450</sup> PBS), poly-GA was present in the insoluble fraction  
344 from mice treated with <sup>ch</sup> $\alpha$ -GA<sub>1</sub> or <sup>ch</sup> $\alpha$ -GA<sub>3</sub> antibodies (*SI Appendix, Fig. S12E*, fraction 2).

345 Notably, similar results were obtained when antibodies were directly spiked into mouse brain  
346 homogenates further confirming that poly-GA antibodies form immune complexes with poly-  
347 GA that migrate in insoluble fractions and interfere with immunoassay's detection when  
348 samples are not efficiently denatured (*SI Appendix, Fig. S12F-H*).

349 To accurately investigate the effect of antibody treatment on poly-GA levels, we adapted the  
350 protocol by denaturing any carry-over antibody that might interfere with the poly-GA  
351 immunoassay using resuspension in SDS/tris(2-carboxyethyl)phosphine (TCEP) and boiling  
352 of the samples (**Fig. 4B**, right panel, and **Fig. 4C**). The samples were also subjected to  
353 centrifugation and ultracentrifugation after homogenization in 1 % TX100 and 0.25 %  
354 deoxycholate (DOC) (**Fig. 4C**) (1). Denaturation of the brain homogenates demonstrated that  
355 poly-GA levels were unchanged between the different treatment groups in the first  
356 supernatant fraction (S1) (**Fig. 4D**). Consistent with our previous results (*SI Appendix, Fig.*  
357 **S12E**, fraction 2), both <sup>ch</sup> $\alpha$ -GA<sub>1</sub> and <sup>ch</sup> $\alpha$ -GA<sub>3</sub> i.p. injections in C9<sup>450</sup> mice increased the  
358 presence of poly-GA in the pellet fraction (P2) after ultracentrifugation (**Fig. 4E**), supporting  
359 the presence of poly-GA/antibody immune complexes.

### 360 **Chronic administration of human-derived antibodies modulates poly-GA solubility and** 361 **increases poly-GA levels in AAV(G<sub>4</sub>C<sub>2</sub>)<sub>149</sub> mice**

362 The impact of <sup>ch</sup> $\alpha$ -GA<sub>1</sub> antibody was also determined in somatic transgenic mice generated  
363 by intra-cerebroventricular (ICV) administration to post-natal day 0 mice of adeno-associated  
364 virus encoding either 2 or 149 G<sub>4</sub>C<sub>2</sub> hexanucleotide repeats [AAV(G<sub>4</sub>C<sub>2</sub>)<sub>2</sub> or AAV(G<sub>4</sub>C<sub>2</sub>)<sub>149</sub>]  
365 (**Fig. 4F**). Weekly i.p. injections of <sup>ch</sup> $\alpha$ -GA<sub>1</sub> or the IgG isotype control were carried out from  
366 2 to 12 months of age and brains were collected either at 4 or at 12 months of age for poly-  
367 GA and poly-GP measurements (**Fig. 4G-L**). Using an immunoassay that included  
368 denaturation of the samples, we identified a significantly increased accumulation of poly-GA

369 in the supernatant S1 fraction in AAV(G<sub>4</sub>C<sub>2</sub>)<sub>149</sub> mice treated with <sup>ch</sup>α-GA<sub>1</sub> compared to mice  
370 injected with the IgG control at 4 (**Fig. 4G**) and 12 months (**Fig. 4I**). After ultracentrifugation  
371 of the samples, the levels of poly-GA in protein fractions S2 and P2 were not changed at 4  
372 months of age (**Fig. 4H**), but were significantly increased in all fractions from 12-month-old  
373 mice treated with <sup>ch</sup>α-GA<sub>1</sub> compared to mice injected with the IgG control (**Fig. 4J**). On the  
374 contrary, poly-GP solubility and levels were unaltered by <sup>ch</sup>α-GA<sub>1</sub> treatment (**Fig. 4K and L**).  
375 In addition, sarkosyl-insoluble pellets isolated via SarkoSpin (40) from total brain  
376 homogenates of 4-month-old AAV(G<sub>4</sub>C<sub>2</sub>) mice were analyzed via filter retardation assay (*SI*  
377 *Appendix, Fig. S13A and B*). <sup>ch</sup>α-GA<sub>1</sub> antibody was specifically retained on the membrane in  
378 the <sup>ch</sup>α-GA<sub>1</sub>-treated AAV(G<sub>4</sub>C<sub>2</sub>)<sub>149</sub> mouse samples suggesting that the non-denaturing  
379 conditions of the SarkoSpin protocol led to the isolation of sarkosyl-insoluble <sup>ch</sup>α-GA<sub>1</sub>  
380 antibody-poly-GA complexes, which were not observed with IgG isotype control (*SI*  
381 *Appendix, Fig. S13A and B*). Insoluble, poly-ubiquitinated proteins were detected in both  
382 AAV(G<sub>4</sub>C<sub>2</sub>)<sub>149</sub> mouse conditions and their levels were not affected by <sup>ch</sup>α-GA<sub>1</sub> antibody  
383 treatment (*SI Appendix, Fig. S13C and D*).

#### 384 **Chronic administration of human-derived antibodies did not impact poly-GA aggregate** 385 **load in AAV(G<sub>4</sub>C<sub>2</sub>)<sub>149</sub> mice**

386 By 4 months of age, AAV(G<sub>4</sub>C<sub>2</sub>)<sub>149</sub> mice accumulated large perinuclear poly-GA aggregates  
387 throughout the brain that co-localized with poly-GR and poly-GP (*SI Appendix, Fig. S14A*  
388 *and B*), as observed in postmortem tissues from patients (7). We determined the area  
389 occupied by poly-GA aggregates in AAV(G<sub>4</sub>C<sub>2</sub>)<sub>149</sub> mice treated for 2 or 10 months with <sup>ch</sup>α-  
390 GA<sub>1</sub> antibody compared to mice treated with the IgG isotype control. To test whether  
391 treatment with α-GA antibodies may interfere with detection of aggregates (as observed in  
392 immunoassays without strong denaturation; **Fig. 4B**, *SI Appendix, Fig. S12D and G*),  
393 immunofluorescence was performed using either an antibody raised against poly-GA (37) or



394 an antibody raised against a N-terminal peptide starting at a CUG initiation codon in the  
395 poly-GA frame (10). When using an anti-GA antibody to detect aggregates there was no  
396 change in the poly-GA aggregates after 2 months of treatment (*SI Appendix, Fig. S14C* and  
397 *D*), but the area appeared significantly decreased in the cortex after 10 months of treatment  
398 with <sup>ch</sup> $\alpha$ -GA<sub>1</sub> antibody (*SI Appendix, Fig. S14E*). A non-significant similar trend was  
399 observed in the hippocampus (*SI Appendix, Fig. S14F*). However, this reduction was not  
400 observed when we used an antibody raised against the N-terminal peptide of poly-GA (**Fig.**  
401 **5A-C**), demonstrating the importance of using antibodies that recognize different epitopes  
402 than the treatment antibody when assessing the effect of an immunotherapy against poly-GA.

403 As expected, poly-GP aggregates were not affected in either the cortex (**Fig. 5D** left panels,  
404 and **Fig. 5E**) or the hippocampus (**Fig. 5D** right panels, and **Fig. 5F**). The level of poly-GR  
405 measured by immunoassay (*SI Appendix, Fig. S14G*) and the area of poly-GR aggregates (*SI*  
406 *Appendix, Fig. S14H*) were also not modified by treatment with <sup>ch</sup> $\alpha$ -GA<sub>1</sub> antibody. Similarly,  
407 the number of phospho-TDP-43 aggregates detected by immunohistochemistry in  
408 AAV(G<sub>4</sub>C<sub>2</sub>)<sub>149</sub> mice was not altered by treatment with <sup>ch</sup> $\alpha$ -GA<sub>1</sub> (*SI Appendix, Fig. S15A* and  
409 *B*).

#### 410 **Long-term *in vivo* administration of DPR antibodies was well tolerated with a modest** 411 **impact on behavior in C9<sup>450</sup> mice**

412 C9<sup>450</sup> mice were treated by weekly injection of <sup>ch</sup> $\alpha$ -GA<sub>1</sub>, <sup>ch</sup> $\alpha$ -GA<sub>3</sub> and <sup>ch</sup> $\alpha$ -GP<sub>1</sub> from 3 to 19  
413 months of age (**Fig. 4A**). Antibody titers in serum (measured every 2 months, 24 hrs after  
414 injection) remained stable over time (*SI Appendix, Fig. S16A-C*). Chronic administration did  
415 not result in any obvious adverse effects, with comparable survival (**Fig. 6A**) and body  
416 weight (*SI Appendix, Fig. S16D* and *E*) between the different treatment groups,  
417 demonstrating the tolerability of all three antibodies at 30 mg/kg per week for 16 months. At

418 13 months of age, only C9<sup>450</sup> males exhibited a decreased activity with a significant reduction  
419 in distance moved compared to age-matched wild-type mice in an open-field assay (*SI*  
420 *Appendix, Fig. S16F*). At this age, these differences were not impacted by <sup>ch</sup> $\alpha$ -GA<sub>1</sub>, <sup>ch</sup> $\alpha$ -GA<sub>3</sub>  
421 and <sup>ch</sup> $\alpha$ -GP<sub>1</sub> antibody treatment (*SI Appendix, Fig. S16F*). However, by 18 months of age,  
422 C9<sup>450</sup> mice treated with PBS continued to display a significantly decreased activity compared  
423 to wild-type animals, while mice treated with <sup>ch</sup> $\alpha$ -GA<sub>3</sub> showed a significant rescue when  
424 compared to C9<sup>450</sup> animals treated with PBS (p=0.0149) (**Fig. 6B**). Mice treated with <sup>ch</sup> $\alpha$ -GA<sub>1</sub>  
425 and <sup>ch</sup> $\alpha$ -GP<sub>1</sub> antibodies also showed a non-significant trend towards improvement in this  
426 behavioral assay (**Fig. 6B**). As previously reported (37), C9<sup>450</sup> mice develop a loss of  
427 hippocampal neurons that was not significantly alleviated by treatment with DPR antibodies  
428 (**Fig. 6C**).

#### 429 **Long-term *in vivo* administration of DPR antibodies did not significantly impact disease** 430 **progression in AAV(G<sub>4</sub>C<sub>2</sub>)<sub>149</sub> mice**

431 AAV(G<sub>4</sub>C<sub>2</sub>)<sub>149</sub> mice were treated by weekly i.p. injection of <sup>ch</sup> $\alpha$ -GA<sub>1</sub> at 30 mg/kg from 2 to  
432 12 months of age (**Fig. 4E**). The survival of these mice was not impacted by the expression of  
433 the G<sub>4</sub>C<sub>2</sub> repeats as previously described (42) and antibody treatment was well tolerated (**Fig.**  
434 **6D** and *SI Appendix, Fig. S16G-H*). AAV(G<sub>4</sub>C<sub>2</sub>)<sub>149</sub> mice presented abnormal activity  
435 including increases in distance traveled and velocity of movement, and time spent moving on  
436 an open-field assay compared to control AAV(G<sub>4</sub>C<sub>2</sub>)<sub>2</sub> mice (**Fig. 6E-G**). These phenotypes  
437 were not impacted by chronic administration of <sup>ch</sup> $\alpha$ -GA<sub>1</sub> antibody. When assessing strength  
438 by measuring the ability to cling on an inverted metal grid, female AAV(G<sub>4</sub>C<sub>2</sub>)<sub>149</sub> mice  
439 showed significantly lower performance compared to AAV(G<sub>4</sub>C<sub>2</sub>)<sub>2</sub> mice (p = 0.002) (**Fig.**  
440 **6H**). Although there was a trend towards improvement, the deficit in AAV(G<sub>4</sub>C<sub>2</sub>)<sub>149</sub> mice  
441 was not significantly rescued by <sup>ch</sup> $\alpha$ -GA<sub>1</sub> treatment (p = 0.11). In addition, treatment with <sup>ch</sup> $\alpha$ -

442 GA<sub>1</sub> did not impact the decrease in brain weight observed in AAV(G<sub>4</sub>C<sub>2</sub>)<sub>149</sub> mice compared  
443 to AAV(G<sub>4</sub>C<sub>2</sub>)<sub>2</sub> mice (**Fig. 6I**).

444

## 445 **Discussion**

446 In this study, we have characterized potential immunotherapies (based on human antibodies)  
447 for C9ORF72-related ALS and FTD. Eleven antibodies against all five C9ORF72 DPR  
448 species were identified and systematically characterized. The exact trigger(s) leading to the  
449 production of antibodies against DPRs in healthy people is unknown. It is conceivable that  
450 due to their highly repetitive sequences, DPRs may present sequence or structural similarities  
451 with other antigens potentially derived from bacteria or viruses. Alternatively, the 2 to 30  
452 (G<sub>4</sub>C<sub>2</sub>) repeats found in the normal population may produce DPR proteins at a very low rate,  
453 which may trigger an antibody-mediated immune response without being pathogenic. While  
454 we have systematically characterized antibodies against each C9ORF72-related DPR, we  
455 focused on antibodies against poly-GA, recognizing that this DPR is the most abundant with  
456 high aggregation propensity in ALS/FTD human autopsy brain samples (7, 43) and with  
457 strong neurotoxicity in mice (20, 23). Moreover, poly-GA has the ability to trap other DPR  
458 species and modulate C9ORF72 toxicity observed in multiple cellular and animal models (21,  
459 22, 24).

460 While antibody treatment against intracellular Tau and  $\alpha$ -synuclein are currently being tested  
461 for Alzheimer's and Parkinson's diseases respectively (28, 29, 33), the exact mechanisms of  
462 action of immunotherapy against intracellular proteins remain unclear. Antibodies were  
463 shown to either facilitate clearance of the target or to prevent spreading and toxicity. The  
464 tested  $\alpha$ -GA antibodies were robustly internalized by poly-GA-expressing human neurons, a  
465 finding in line with published studies showing antibody uptake by neuronal cells (35, 36). In  
466 this cellular model, intracellular antibodies colocalized with poly-GA in cytoplasmic puncta,

467 however, less prominently to very dense and large intracellular aggregates formed over time.  
468 It is possible that their compact structure may conceal the epitope recognized by the antibody.  
469 Alternatively, poly-GA physical associations with other proteins may interfere with epitope  
470 recognition. Antibody and poly-GA colocalized partially with late-endosomes and lysosomes,  
471 but anti-GA antibody treatment did not significantly alter GA<sub>50</sub>-GFP vesicular localization.  
472 Whether antibody and antigen entered the same degradation pathway independently, or  
473 antibody binding on poly-GA triggered its engulfment in endocytic vesicles, thereby  
474 potentially stimulating its clearance remains unanswered. It is also possible that the antibodies  
475 engaged the poly-GA extracellularly and entered human neurons already as a complex.  
476 However, the absence of antibody-engaged poly-GA in non-transduced, wild-type neurons  
477 present in the same neuronal network challenges that notion. Rather, as supported by super  
478 resolution microscopy, the dense GA<sub>50</sub>-GFP inclusions and aggregates may be present in a  
479 different compartment than the antibody-engaged poly-GA. Notably, despite target  
480 engagement in our cellular models and reduction of poly-GA aggregates in T98G anchorage  
481 independent cancer cell line, intracellular GA<sub>50</sub>-GFP inclusions and aggregates were not  
482 affected by antibody treatment in cultured human neurons, highlighting differences between  
483 cell types.

484 Of note, the three cellular models used in this study were differently modified to overexpress  
485 poly-GA. While the liposome-mediated transfection of SH-SY5Y cells may have indirectly  
486 enhanced the antibody “uptake” because of partially compromised cell membrane, both the  
487 T98G cells (stable transfection) and human neurons (lentivirus-mediated gene delivery and  
488 cell recovery for several days before antibody treatment) likely had intact cell membrane and  
489 thus accurately modeled antibody uptake and/or retention in cancer cells or human neurons,  
490 respectively. Interestingly, anti-GA antibodies did engage less prominently the dense poly-  
491 GA aggregates in human neurons synthesizing poly-GA, compared to their targeting of

492 aggregates in stably transfected T98G cancer cells. This points to a distinct aggregate  
493 handling between cycling cells and differentiated neurons. In addition, IF experiments with  
494 fixed and permeabilized motor neuron-like NSC-34 cells overexpressing poly-GA via  
495 transient transfection revealed that all tested anti-GA antibodies ( $\alpha$ -GA<sub>1-4</sub>) only partially  
496 recognized dense poly-GA aggregates.

497 It was previously shown that poly-GA is released into the extracellular space and can be  
498 taken up by neighboring cells, thereby increasing DPR aggregation (22, 32, 34). A similar  
499 mechanism may account for spreading of DPR pathology throughout the nervous system, as  
500 was hypothesized for other intracellular protein aggregates found in ALS/FTD (44), a process  
501 that may be blocked by immunotherapy. We showed that human-derived antibodies  
502 efficiently captured extracellular poly-GA over the course of 3 weeks forming large immune  
503 complexes in human neuronal cultures. This was also described in the context of Alzheimer's  
504 disease, where an anti-Tau antibody blocked toxicity and spreading through the formation of  
505 immune complexes (45). We were unable to assess whether the formation of poly-  
506 GA/antibody immune complexes could rescue poly-GA toxicity in this cellular system, since  
507 we found no detectable poly-GA toxicity within the time course of 21 days.

508 In contrast to previous studies that reported a decrease in intracellular aggregates and  
509 insolubility of poly-GA upon  $\alpha$ -GA treatment in cells (1, 32), our analysis in cultured human  
510 neurons did not find a decrease of intracellular inclusions and showed a significant increase  
511 of poly-GA insolubility, likely due to the formation of immune complexes (**Fig. 3**).  
512 Antibody-induced insolubility has been previously reported for  $\alpha$ -synuclein, which formed  
513 amorphous aggregates *in vitro* in the presence of four out of six tested  $\alpha$ -synuclein antibodies  
514 (46). In comparison to  $\alpha$ -synuclein, which has a strong ability to form fibrils (46), the  
515 unusually high hydrophobic and low complexity nature of poly-GA (7, 15) may make it more  
516 prone to clump into amorphous aggregates when molecules are brought into close proximity

517 following antibody binding. An antibody selective for soluble Tau triggered the formation of  
518 extracellular complexes and protected against exogenous paired helical filament toxicity,  
519 while an alternative antibody directed against aggregated Tau failed at forming extracellular  
520 immune complexes and could not confer cellular protection (45).

521 We also observed that the detection of poly-GA either by immunoassay or by  
522 immunofluorescence staining was altered by treatment with anti-GA antibodies. Indeed,  
523 using an antibody that does not recognize the poly-GA epitopes but rather a N-terminal  
524 peptide translated in frame with poly-GA (10), we demonstrated that poly-GA aggregates  
525 were not affected by 9 months of <sup>ch</sup> $\alpha$ -GA<sub>1</sub> treatment in AAV(G<sub>4</sub>C<sub>2</sub>)<sub>149</sub> mice (**Fig. 5**).  
526 However, the aggregate load appeared reduced when immunostaining was performed using  
527 an antibody against poly-GA (*SI Appendix, Fig. S14E*), suggesting that the treatment with  
528 <sup>ch</sup> $\alpha$ -GA<sub>1</sub> antibody may block the recognition of poly-GA epitopes by the detecting antibody  
529 leading to underestimation of poly-GA aggregates. The vast majority, if not all, of poly-GA  
530 is translated from a start codon located 24 nucleotides upstream of the repeat that encode the  
531 N-terminal peptide (10, 47). Hence, it is unlikely that the poly-GA species detected by the N-  
532 terminal peptide directed-antibody represent only a subset of poly-GA that would be  
533 differently impacted by the treatment. In addition, an interference between the treatment and  
534 detection antibodies was demonstrated in a biochemical assay lacking efficient denaturation  
535 of the samples before poly-GA measurement (*SI Appendix, Fig. S12*). Such an interference  
536 was not observed for the uncharged, flexible and highly soluble (48) poly-GP molecules (*SI*  
537 *Appendix, Fig. S12C*) suggesting that intrinsic structural features of poly-GA are altered by  
538 antibody recognition, as supported by our SEM analysis of purified poly-GA (**Fig. 3I-M**).  
539 Combined with the robust formation of poly-GA-antibody complexes evident in all our  
540 cellular work, these changes highlight the necessity of analyzing all biochemical fractions  
541 when comparing antibody-treated to non-treated conditions. While interference between the

542 treatment and detecting antibodies or antibody-induced biochemical changes may not be an  
543 issue for all proteins, our study demonstrates that careful denaturation of biochemical  
544 samples and use of antibodies recognizing independent epitopes is warranted for accurate  
545 assessment of the impact of immunotherapies on aggregation-prone proteins.

546 In this study, we have not observed a reversal of the clinical phenotypes linked to *C9ORF72*  
547 disease in our antibody-treated AAV( $G_4C_2$ )<sub>149</sub> mice. This is contrary to a recently published  
548 study in a *C9ORF72* BAC model (1). The reason for this discrepancy in response to the  
549 antibody treatment is unknown – one possibility is that the different mouse models used in  
550 the two studies display different phenotypes resulting in differential responses to antibody  
551 treatment. Alternatively, the discrepancy may be linked to the fact that in contrast to other  
552 described mouse models expressing  $G_4C_2$  *C9ORF72* repeats (37, 38, 42, 49, 50), the model  
553 used in the Nguyen et al. study has been reported to develop severe neurodegeneration (1).  
554 Mordes et al (51) described that two independent cohorts of the same model had similar  
555 levels of DPRs but did not have the same behavioral phenotypes previously reported in these  
556 mice. While independent laboratories reproduced the originally reported phenotypes in the  
557 *C9ORF72* BAC mouse model (52), Mordes and colleagues (51) proposed that the severe  
558 neurodegeneration reported in a fraction of the mice used by Nguyen and colleagues may be  
559 linked to the space cadet syndrome (SCS), previously reported in WT mice with an FVB/N  
560 background (53). While *C9ORF72*-linked neurodegeneration may be exacerbated by – and  
561 potentially distinguished from – the severe seizure phenotypes affecting both *C9ORF72* and  
562 non-transgenic animals (52), future studies are necessary to determine the relative  
563 contribution(s) of the *C9ORF72* repeat expansion, the DPR expression levels and the SCS-  
564 linked pathologies to the described phenotypes and their immunotherapy-driven reversal in  
565 different mouse models.

566 In the current study, we have not observed target engagement by IHC in the brains of our  
567 C9<sup>450</sup> antibody-treated mice. We have observed constant antibody plasma titers over 1.5  
568 years with brain penetration of a small fraction (~0.1 %) of the injected antibody (as  
569 previously shown (25) for other antibodies), but peripherally injected human antibodies were  
570 not found to co-localize with neuronal poly-GA aggregates (*SI Appendix, Fig. S11E*). The  
571 reason for this difference from the observations in Nguyen et al. (1) is unclear, but it is  
572 conceivable that the severe neurodegeneration and/or SCS pathology in the mice used by  
573 Nguyen et al. may be associated with blood-brain barrier leakage, which might facilitate  
574 antibody entry to the brain. Whether that accounts for the reported decrease in poly-GA load  
575 in these mice remains to be clarified.

576 In our C9<sup>450</sup> cohort, the levels of poly-GA and poly-GP could be measured by immunoassay  
577 but the number of poly-GA aggregates were too low to evaluate the effect of antibody  
578 treatment on poly-GA aggregate load. Despite the lack of widespread poly-GA pathology,  
579 long term treatment with anti-GA antibodies improved an open field movement test in aged  
580 C9<sup>450</sup> mice (albeit modestly). In AAV(G<sub>4</sub>C<sub>2</sub>)<sub>149</sub> mice, anti-GA treatment failed to ameliorate  
581 brain atrophy and poly-GA levels increased following treatment during 9 months. This  
582 finding supports that at least a small portion of peripherally injected antibodies accessed  
583 poly-GA in the brain and impacted its turn-over. Targeting some of the other reportedly toxic  
584 DPR proteins, such as poly-GR and poly-PR, may be an alternative and potentially  
585 synergistic approach to treat *C9orf72* disease which should be explored in future studies.  
586 Furthermore, we anticipate that antibody delivery is key for the success of immunotherapy  
587 and approaches to increase antibody penetration to the central nervous system (54) might  
588 result in enhanced therapeutic benefit.

589



590 **References:**

- 591 1. Nguyen L, *et al.* (2020) Antibody Therapy Targeting RAN Proteins Rescues C9  
592 ALS/FTD Phenotypes in C9orf72 Mouse Model. *Neuron* 105(4):645-662 e611.
- 593 2. Zhou Q, *et al.* (2020) Active poly-GA vaccination prevents microglia activation and  
594 motor deficits in a C9orf72 mouse model. *EMBO Mol Med* 12(2):e10919.
- 595 3. Renton A, *et al.* (2011) A hexanucleotide repeat expansion in C9ORF72 is the cause  
596 of chromosome 9p21-linked ALS-FTD. *Neuron* 72:257 - 268.
- 597 4. DeJesus-Hernandez M, *et al.* (2011) Expanded GGGGCC hexanucleotide repeat in  
598 noncoding region of C9ORF72 causes chromosome 9p-linked FTD and ALS. *Neuron*  
599 72:245 - 256.
- 600 5. Taylor JP, Brown RH, Jr., & Cleveland DW (2016) Decoding ALS: from genes to  
601 mechanism. *Nature* 539(7628):197-206.
- 602 6. Ash PE, *et al.* (2013) Unconventional translation of C9ORF72 GGGGCC expansion  
603 generates insoluble polypeptides specific to c9FTD/ALS. *Neuron* 77(4):639-646.
- 604 7. Mori K, *et al.* (2013) The C9orf72 GGGGCC Repeat Is Translated into Aggregating  
605 Dipeptide-Repeat Proteins in FTL/ALS. *Science* 339(6125):1335-1338.
- 606 8. Zu T, *et al.* (2011) Non-ATG-initiated translation directed by microsatellite  
607 expansions. *Proc Natl Acad Sci U S A* 108(1):260-265.
- 608 9. Gendron TF, *et al.* (2013) Antisense transcripts of the expanded C9ORF72  
609 hexanucleotide repeat form nuclear RNA foci and undergo repeat-associated non-  
610 ATG translation in c9FTD/ALS. *Acta Neuropathol* 126(6):829-844.
- 611 10. Tabet R, *et al.* (2018) CUG initiation and frameshifting enable production of  
612 dipeptide repeat proteins from ALS/FTD C9ORF72 transcripts. *Nat Commun*  
613 9(1):152.
- 614 11. Cheng W, *et al.* (2018) C9ORF72 GGGGCC repeat-associated non-AUG translation  
615 is upregulated by stress through eIF2 $\alpha$  phosphorylation. *Nat Commun* 9(1):51.
- 616 12. Gendron TF, *et al.* (2015) Cerebellar c9RAN proteins associate with clinical and  
617 neuropathological characteristics of C9ORF72 repeat expansion carriers. *Acta*  
618 *Neuropathologica* 130(4):559-573.
- 619 13. Mann DM, *et al.* (2013) Dipeptide repeat proteins are present in the p62 positive  
620 inclusions in patients with frontotemporal lobar degeneration and motor neurone  
621 disease associated with expansions in C9ORF72. *Acta Neuropathologica*  
622 *Communications* 1(1):68.
- 623 14. Al-Sarraj S, *et al.* (2011) p62 positive, TDP-43 negative, neuronal cytoplasmic and  
624 intranuclear inclusions in the cerebellum and hippocampus define the pathology of  
625 C9orf72-linked FTL/ALS. *Acta Neuropathol* 122(6):691-702.
- 626 15. Kwon I, *et al.* (2014) Poly-dipeptides encoded by the C9ORF72 repeats bind nucleoli,  
627 impede RNA biogenesis, and kill cells. *Science*.
- 628 16. Mizielinska S, *et al.* (2014) C9orf72 repeat expansions cause neurodegeneration in  
629 *Drosophila* through arginine-rich proteins. *Science*.
- 630 17. Lee KH, *et al.* (2016) C9orf72 Dipeptide Repeats Impair the Assembly, Dynamics,  
631 and Function of Membrane-Less Organelles. *Cell* 167(3):774-788 e717.
- 632 18. Shi KY, *et al.* (2017) Toxic PRn poly-dipeptides encoded by the C9orf72 repeat  
633 expansion block nuclear import and export. *Proc Natl Acad Sci U S A* 114(7):E1111-  
634 E1117.
- 635 19. Lin Y, *et al.* (2016) Toxic PR Poly-Dipeptides Encoded by the C9orf72 Repeat  
636 Expansion Target LC Domain Polymers. *Cell* 167(3):789-802 e712.
- 637 20. Zhang YJ, *et al.* (2016) C9ORF72 poly(GA) aggregates sequester and impair HR23  
638 and nucleocytoplasmic transport proteins. *Nat Neurosci* 19(5):668-677.

- 639 21. Guo Q, *et al.* (2018) In Situ Structure of Neuronal C9orf72 Poly-GA Aggregates  
640 Reveals Proteasome Recruitment. *Cell* 172(4):696-705 e612.
- 641 22. Chang YJ, Jeng US, Chiang YL, Hwang IS, & Chen YR (2016) The Glycine-Alanine  
642 Dipeptide Repeat from C9orf72 Hexanucleotide Expansions Forms Toxic Amyloids  
643 Possessing Cell-to-Cell Transmission Properties. *J Biol Chem* 291(10):4903-4911.
- 644 23. LaClair KD, *et al.* (2020) Congenic expression of poly-GA but not poly-PR in mice  
645 triggers selective neuron loss and interferon responses found in C9orf72 ALS. *Acta*  
646 *Neuropathol* 140(2):121-142.
- 647 24. Brody DL & Holtzman DM (2008) Active and Passive Immunotherapy for  
648 Neurodegenerative Disorders. *Annual Review of Neuroscience* 31(1):175-193.
- 649 25. Sevigny J, *et al.* (2016) The antibody aducanumab reduces Abeta plaques in  
650 Alzheimer's disease. *Nature* 537(7618):50-56.
- 651 26. Rinne JO, *et al.* (2010) 11C-PiB PET assessment of change in fibrillar amyloid-beta  
652 load in patients with Alzheimer's disease treated with bapineuzumab: a phase 2,  
653 double-blind, placebo-controlled, ascending-dose study. *Lancet Neurol* 9(4):363-372.
- 654 27. Kastanenka KV, *et al.* (2016) Immunotherapy with Aducanumab Restores Calcium  
655 Homeostasis in Tg2576 Mice. *J Neurosci* 36(50):12549-12558.
- 656 28. Boutajangout A, Quartermain D, & Sigurdsson EM (2010) Immunotherapy targeting  
657 pathological tau prevents cognitive decline in a new tangle mouse model. *J Neurosci*  
658 30(49):16559-16566.
- 659 29. Yanamandra K, *et al.* (2013) Anti-tau antibodies that block tau aggregate seeding in  
660 vitro markedly decrease pathology and improve cognition in vivo. *Neuron* 80(2):402-  
661 414.
- 662 30. Masliah E, *et al.* (2005) Effects of alpha-synuclein immunization in a mouse model of  
663 Parkinson's disease. *Neuron* 46(6):857-868.
- 664 31. Maier M, *et al.* (2018) A human-derived antibody targets misfolded SOD1 and  
665 ameliorates motor symptoms in mouse models of amyotrophic lateral sclerosis. *Sci*  
666 *Transl Med* 10(470).
- 667 32. Zhou Q, *et al.* (2017) Antibodies inhibit transmission and aggregation of C9orf72  
668 poly-GA dipeptide repeat proteins. *EMBO Mol Med* 9(5):687-702.
- 669 33. Tran HT, *et al.* (2014) Alpha-synuclein immunotherapy blocks uptake and templated  
670 propagation of misfolded alpha-synuclein and neurodegeneration. *Cell Rep* 7(6):2054-  
671 2065.
- 672 34. Westergard T, *et al.* (2016) Cell-to-Cell Transmission of Dipeptide Repeat Proteins  
673 Linked to C9orf72-ALS/FTD. *Cell Rep* 17(3):645-652.
- 674 35. Congdon EE, Gu J, Sait HB, & Sigurdsson EM (2013) Antibody uptake into neurons  
675 occurs primarily via clathrin-dependent Fcγ receptor endocytosis and is a  
676 prerequisite for acute tau protein clearance. *J Biol Chem* 288(49):35452-35465.
- 677 36. Gustafsson G, *et al.* (2017) Cellular Uptake of alpha-Synuclein Oligomer-Selective  
678 Antibodies is Enhanced by the Extracellular Presence of alpha-Synuclein and  
679 Mediated via Fcγ Receptors. *Cell Mol Neurobiol* 37(1):121-131.
- 680 37. Jiang J, *et al.* (2016) Gain of Toxicity from ALS/FTD-Linked Repeat Expansions in  
681 C9ORF72 Is Alleviated by Antisense Oligonucleotides Targeting GGGCC-  
682 Containing RNAs. *Neuron* 90(3):535-550.
- 683 38. Chew J, *et al.* (2015) Neurodegeneration. C9ORF72 repeat expansions in mice cause  
684 TDP-43 pathology, neuronal loss, and behavioral deficits. *Science* 348(6239):1151-  
685 1154.
- 686 39. Hruska-Plochan M, *et al.* (2021) Human neural networks with sparse TDP-43  
687 pathology reveal NPTX2 misregulation in ALS/FTLD.  
688 *bioRxiv:2021.2012.2008.471089*.

- 689 40. Laferriere F, *et al.* (2019) TDP-43 extracted from frontotemporal lobar degeneration  
690 subject brains displays distinct aggregate assemblies and neurotoxic effects reflecting  
691 disease progression rates. *Nat Neurosci* 22(1):65-77.
- 692 41. Levites Y, *et al.* (2006) Insights into the mechanisms of action of anti-Abeta  
693 antibodies in Alzheimer's disease mouse models. *FASEB J* 20(14):2576-2578.
- 694 42. Chew J, *et al.* (2019) Aberrant deposition of stress granule-resident proteins linked to  
695 C9orf72-associated TDP-43 proteinopathy. *Mol Neurodegener* 14(1):9.
- 696 43. Mackenzie IR, *et al.* (2015) Quantitative analysis and clinico-pathological  
697 correlations of different dipeptide repeat protein pathologies in C9ORF72 mutation  
698 carriers. *Acta Neuropathol* 130(6):845-861.
- 699 44. Polymenidou M & Cleveland DW (2011) The seeds of neurodegeneration: prion-like  
700 spreading in ALS. *Cell* 147(3):498-508.
- 701 45. Congdon EE, *et al.* (2016) Affinity of Tau antibodies for solubilized pathological Tau  
702 species but not their immunogen or insoluble Tau aggregates predicts in vivo and ex  
703 vivo efficacy. *Mol Neurodegener* 11(1):62.
- 704 46. Sahin C, *et al.* (2017) Antibodies against the C-terminus of alpha-synuclein modulate  
705 its fibrillation. *Biophys Chem* 220:34-41.
- 706 47. Almeida S, *et al.* (2019) Production of poly(GA) in C9ORF72 patient motor neurons  
707 derived from induced pluripotent stem cells. *Acta Neuropathol* 138(6):1099-1101.
- 708 48. Freibaum BD & Taylor JP (2017) The Role of Dipeptide Repeats in C9ORF72-  
709 Related ALS-FTD. *Frontiers in Molecular Neuroscience* 10(35).
- 710 49. O'Rourke JG, *et al.* (2015) C9orf72 BAC Transgenic Mice Display Typical  
711 Pathologic Features of ALS/FTD. *Neuron* 88(5):892-901.
- 712 50. Peters OM, *et al.* (2015) Human C9ORF72 Hexanucleotide Expansion Reproduces  
713 RNA Foci and Dipeptide Repeat Proteins but Not Neurodegeneration in BAC  
714 Transgenic Mice. *Neuron* 88(5):902-909.
- 715 51. Mordes DA, *et al.* (2020) Absence of Survival and Motor Deficits in 500 Repeat  
716 C9ORF72 BAC Mice. *Neuron*.
- 717 52. Nguyen L, *et al.* (2020) Survival and Motor Phenotypes in FVB C9-500 ALS/FTD  
718 BAC Transgenic Mice Reproduced by Multiple Labs. *Neuron*.
- 719 53. Ward JM (2000) *Pathology of genetically engineered mice* (Iowa State University  
720 Press, Ames) 1st Ed pp xi, 394 p.
- 721 54. Bravo-Hernandez M, *et al.* (2020) Spinal subpial delivery of AAV9 enables  
722 widespread gene silencing and blocks motoneuron degeneration in ALS. *Nat Med*  
723 26(1):118-130.
- 724
- 725

726 **Acknowledgments:** We are grateful to Moritz Kirshmann and Joe Weber for support in data  
727 analysis, to Ulrich Wagner for statistical analysis, to Nicola Bothwick for mouse brain  
728 analysis, and to Moaz Abdelrehim and Mohamed Al Abdulla for technical help. We are  
729 grateful to Asvin Lankkaraju in Adriano Aguzzi's laboratory for providing Rab7 and Lamp1  
730 antibodies. We thank all the members of the Albers, Wainger and Aguzzi laboratories for  
731 helpful discussions. Imaging was performed at the Center for Microscopy and Image

732 Analysis with assistance from Johannes Riemann and Andres Kaech (University of Zurich)  
733 as well as with microscopes from Rudy Tanzi's and Brian Wainger's laboratories (MGH).

734 Human postmortem tissues were obtained from Matthew Frosch and Jose McLean at the  
735 Massachusetts Alzheimer's Disease Research Center (PG50 AG005134).

736 **Funding:** This work was supported by grants from the ALS Association and NINDS/NIH  
737 (R01NS087227) to CLT and from Target ALS to CLT and MP. MJ received a doctoral  
738 fellowship from the University of Zurich (K-74423-04-01) and a NCCR mobility grant from  
739 the Swiss National Science Foundation (51NF40-141735). RT was supported by the Philippe  
740 Foundation and FF by an ECOR Tosteson Postdoctoral Fellowship. MHP was supported by a  
741 Milton Safenowitz Postdoctoral Fellowship (16-PDF-247), a postdoctoral fellowship from  
742 the University of Zurich (FK-15-097) and the Promotor-Stiftung from the Georges and  
743 Antoine Claraz Foundation.

744 **Author contribution:** RT, CZL, KDM, MJ, MHP, ARS, NM, CA, PB, KS, NM, NC, PB,  
745 SD, ID, CCL, JJ, XJ, JP, SN, YG, SD, IDL, ZM, JW, MW, MM, KS, TG, MP, FM and CLT  
746 conducted experiments or analyzed data; KJW, JJ, FF, NL, PDR, MPB, LMD, EB, YZ, JB,  
747 BW, MWK, MR, CH, RMN, DWC, LP supplied material and/or gave significant input; MJ,  
748 KDM, RT, MHP, ARS, MWK, MR, MP, CLT, FM, JG, DWC, LP wrote or edited the  
749 manuscript.

750 **Competing interests:** KDM, NC, PB, CH, RMN, FM, JG are employees of Neurimmune  
751 and SN, YG, SD, ID, MWK, MR are employees of Biogen.

752 **Data and materials availabilities:** The data that support the findings of this study are  
753 available from the corresponding authors upon request. Constructs and reagents generated in  
754 this study can be shared upon request with establishment of an appropriate material transfer  
755 agreement. There may be restrictions to the availability of some data/reagents due to  
756 agreements with industry partners.

757

758 **List of Supplementary Materials:**

759 **Materials and Methods**

760 **Tables S1, Figure S1-S16**

761

762 **Legends**

763

764 **Fig. 1. Antibody uptake and poly-GA colocalization in living cells**

765 **(A)** Confocal fluorescence images of SH-SY5Y cells transfected with GA<sub>50</sub>-GFP (green) and  
766 incubated with human  $\alpha$ -GA<sub>1</sub>,  $\alpha$ -GA<sub>3</sub> or an IgG control antibody (72 hrs). Antibodies were  
767 visualized after fixation with a secondary  $\alpha$ -human IgG antibody (red) and nuclei with DAPI  
768 (blue). Scale = 100  $\mu$ m. **(B)** Percentage of GA<sub>50</sub>-GFP area that colocalized with antibody. N =  
769 4 biological replicates from 2 independent experiments. Mean value of each replicate  
770 calculated from 3 distinct fields. **(C)** Flow cytometry-based approach to quantify the uptake  
771 of labeled antibodies into cells transfected with HA-GA<sub>50</sub> or no plasmid (mock transfected).  
772 Membrane-associated antibodies were degraded by trypsin and any remaining extracellular  
773 signal was quenched by Trypan Blue. **(D)** HA-GA<sub>50</sub> or mock transfected SH-SY5Y cells  
774 incubated with Alexa 488-labeled  $\alpha$ -GA<sub>1</sub>,  $\alpha$ -GA<sub>3</sub> or the IgG control and analyzed by flow  
775 cytometry. Viable, singlet cells were selected for fluorescence negative (grey) or positive  
776 (orange, red or black) populations. **(E)** Percentage of antibody-positive cells after 48 hrs.  
777 Each data point represents 30,000 cells. N = 3 biological replicates. **(B, E)** Mean  $\pm$  SD, one-  
778 way ANOVA followed by Tukey's multiple comparison test. **(F)** Immunofluorescence of  
779 T98G cells expressing GA<sub>161</sub>-GA (green) and treated with antibody (red) for 72 hrs. **(G, H)**  
780 Compared with IgG control-treated cells,  $\alpha$ -GA<sub>1</sub>-treated cells exhibited a significant  
781 reduction in the number of poly-GA aggregates per cell **(G)** and in volume of aggregates per  
782 cell **(H)**. N = 3 biological triplicates with 10 or 11 fields captured per replicate. Mean  $\pm$  SD,  
783 unpaired two-tailed t-test. \* P  $\leq$  0.05, \*\* P  $\leq$  0.01, \*\*\* P  $\leq$  0.001.

784 **Fig. 2. <sup>ch</sup>α-GA<sub>3</sub> is internalized *via* vesicular compartments in human neurons, but does**  
785 **not alter GA<sub>50</sub>-GFP vesicular localization**

786 (A) Confocal images of human neural cultures expressing an inducible GA<sub>50</sub>-GFP construct  
787 treated for 3 days with <sup>ch</sup>α-GA<sub>3</sub> or IgG control, and stained with a secondary α-human  
788 antibody (red). White arrows show antibody/GA<sub>50</sub>-GFP double positive cells and arrowheads  
789 show antibody uptake in cells not expressing GA<sub>50</sub>-GFP. Scale = 20 μm. (B) Quantification  
790 of the percentage of GA<sub>50</sub>-GFP expressing cells with internalized antibody. Four replicates,  
791 unpaired t-test. \*\*\* P < 0.0001. (C) Confocal images after staining with either α-RAB7 (late  
792 endosomes) or α-LAMP1 (lysosomes) and with α-mouse antibody (red) to detect the  
793 chimeric antibodies. (D) Deconvoluted STED image from a neuron expressing GA<sub>50</sub>-GFP  
794 treated with <sup>ch</sup>α-GA<sub>3</sub> and stained with RAB7. Inset of the STED image (upper panel) and the  
795 created 2D surface (lower panels) are enlarged from the original site (white box). (E)  
796 Distances between each GA<sub>50</sub>-GFP particle and the closest RAB7 or LAMP1 vesicular  
797 markers were measured. The percentage of GA<sub>50</sub>-GFP particles containing a vesicle within a  
798 100 nm radius were considered as colocalized with the indicated vesicle. Each dot represents  
799 a field of view. Mann and Whitney U test (Rab7 p = 0.087 and Lamp1 p = 0.544).

800 **Fig. 3. Poly-GA and antibodies form large hetero-complexes in long-term treated**  
801 **neuronal cultures**

802 (A) Experimental strategies to test the effect of antibody treatment on human neurons  
803 expressing GA<sub>50</sub>-GFP. (B) Immunofluorescence showing GA<sub>50</sub>-GFP in neurons treated for 21  
804 days with either an IgG control (upper panel) or <sup>ch</sup>α-GA<sub>1</sub> (lower panel). Large irregular  
805 extracellular GA<sub>50</sub>-GFP structures were observed only in samples treated with <sup>ch</sup>α-GA<sub>1</sub>  
806 antibody (red arrows and bottom right inset). Insets illustrate different GA<sub>50</sub>-GFP  
807 intracellular structures observed across all conditions including pre-inclusions (white arrows).  
808 Scale = 10 μm and 5 μm. (C) Quantification of intracellular GA<sub>50</sub>-GFP structures normalized

809 to the number of nuclei, 36 images per well, 3-6 wells per condition. **(D)** Quantification of  
810 GA<sub>50</sub>-GFP extracellular structures normalized to the number of nuclei, 5 images per well, 3-6  
811 wells per condition. Means +/- SD, beta-binomial test. **(E)** Confocal imaging of an <sup>ch</sup>α-GA<sub>1</sub>  
812 extracellular structure colocalizing with GA<sub>50</sub>-GFP (upper row), and an IgG control  
813 extracellular structure, not colocalizing with GA<sub>50</sub>-GFP (lower row). Antibodies were  
814 detected with α-mouse-Alexa 647. **(F)** Cell viability assay of human neurons expressing  
815 GA<sub>50</sub>-GFP treated with <sup>ch</sup>α-GA<sub>1,3</sub> or control antibody for 3 days. **(G)** Representative blots of a  
816 filter retardation assay where GA<sub>50</sub>-GFP was detected with an α-GFP antibody. **(H)**  
817 Quantification of the filter retardation blot for human neurons treated during 3, 7 or 21 days  
818 with <sup>ch</sup>α-GA<sub>1</sub> or IgG control. Intensity of each replicate was normalized to the 3 days IgG  
819 control samples. Unpaired t-test is used on the log<sub>10</sub>(x+1) transformed data. **(I)** Epi-  
820 fluorescent image of GA<sub>50</sub>-GFP aggregates isolated from transiently transfected HEK293T  
821 cells. **(J)** Isolated GA<sub>50</sub>-GFP aggregates visualized via SEM imaging. **(K)** Representative  
822 SEM and corresponding IF images of non-treated (NT) or Alexa Fluor 647-labelled isotype  
823 control, α-GA<sub>1</sub>- and α-GA<sub>3</sub>-treated GA<sub>50</sub>-GFP aggregates. **(L-M)** Quantification of the  
824 surface of the antibody treated GA<sub>50</sub>-GFP aggregates assessing their porosity **(L)** and the total  
825 area of the aggregates **(M)**. NT, n=139; isotype, n=125; α-GA<sub>1</sub>, n=183; α-GA<sub>3</sub>, n=193. One-  
826 way ANOVA followed by Tukey's multiple comparison test. P > 0.05 (no indication), \*\* P ≤  
827 0.01, \*\*\* P ≤ 0.001, \*\*\*\* P ≤ 0.0001.

828 **Fig. 4. Immunoassay with sample denaturation identifies elevated levels of poly-GA in**  
829 **brains of mice treated with α-GA antibodies**

830 **(A)** Scheme of chronic antibody treatment in C9<sup>450</sup> mice receiving intra-peritoneal injection  
831 of PBS, <sup>ch</sup>α-GA<sub>1</sub>, <sup>ch</sup>α-GA<sub>3</sub>, or <sup>ch</sup>α-GP<sub>1</sub> antibodies from 3 to 19 months of age. **(B)** Scheme  
832 showing drug-antibody interference in the measurement of poly-GA protein levels using a  
833 sandwich-ELISA assay (left panel). Right panel illustrates the effect of sample denaturation



834 prior to measurements. **(C)** Scheme of a mouse brain fractionation protocol adapted to  
835 denature samples to avoid interference of the antibody treatment by ELISA. Fractions  
836 highlighted in bold were analyzed. **(D, E)** Poly-GA levels measured by immunoassay from  
837 the supernatant S1 **(D)** and after ultracentrifugation (supernatant S2 and pellet P2) **(E)** of  
838 brains from 7-month-old C9<sup>450</sup>. **(F)** Scheme of chronic antibody treatment by intra-peritoneal  
839 injection of <sup>ch</sup> $\alpha$ -GA<sub>1</sub> or IgG control to AAV-(G<sub>4</sub>C<sub>2</sub>) mice from 2 to 12 months of age. **(G-J)**  
840 Poly-GA levels measured by immunoassay from the supernatant S1 **(G, I)** and after  
841 ultracentrifugation (supernatant S2 and pellet P2) **(H, J)** of brains from AAV-(G<sub>4</sub>C<sub>2</sub>) mice at  
842 4 **(G, H)** and 12 **(I, J)** months of age. **(K, L)** Poly-GP levels measured by immunoassay from  
843 the supernatant S1 **(K)** and after ultracentrifugation (supernatant S2 and pellet P2) **(L)** of  
844 brains from AAV-(G<sub>4</sub>C<sub>2</sub>) mice at 12 months of age. Mean  $\pm$  SD, one-way ANOVA followed  
845 by Tukey's multiple comparison tests. Not significant (ns),  $P > 0.05$ , \*  $P \leq 0.05$ , \*\*  $P \leq 0.01$ ,  
846 \*\*\*  $P \leq 0.001$ .

847 **Fig. 5. Chronic administration of human-derived  $\alpha$ -GA<sub>1</sub> antibody does not reduce the**  
848 **poly-GA and poly-GP aggregate load in brains of AAV(G<sub>4</sub>C<sub>2</sub>)<sub>149</sub> mice.**

849 **(A)** Immunofluorescence of poly-GA staining in the motor cortex (left) and hippocampus  
850 (right) of 12-month-old AAV-(G<sub>4</sub>C<sub>2</sub>)<sub>2</sub> or AAV-(G<sub>4</sub>C<sub>2</sub>)<sub>149</sub> mice treated with <sup>ch</sup> $\alpha$ -GA<sub>1</sub> or an IgG  
851 control. **(B-C)** Quantifications of percent area occupied by poly-GA aggregates detected with  
852 a N-terminal-poly-GA antibody in cortex **(B)** and hippocampus **(C)**. **(D)** Immunofluorescence  
853 of poly-GP staining in the motor cortex (left) and hippocampus (right) of 12-month-old  
854 AAV-(G<sub>4</sub>C<sub>2</sub>) mice treated with <sup>ch</sup> $\alpha$ -GA<sub>1</sub> or an IgG control. **(E-F)** Quantifications of percent  
855 area occupied by poly-GP staining in cortex **(E)** and hippocampus **(F)**. Scale = 25  $\mu$ m. Mean  
856  $\pm$  SD, one-way ANOVA followed by Tukey's multiple comparison test. Not significant (ns),  
857  $P > 0.05$ , \*  $P \leq 0.05$ .

858 **Fig. 6. Chronic administration of  $\alpha$ -GA antibodies impacted only a subset of behavioral**  
859 **and neurodegeneration phenotypes in one of two C9ORF72 mouse models**

860 (A) Survival Kaplan–Meier curves of C9<sup>450</sup> and wild-type mice receiving injections of PBS,  
861 <sup>ch</sup> $\alpha$ -GA<sub>1</sub>, <sup>ch</sup> $\alpha$ -GA<sub>3</sub> and <sup>ch</sup> $\alpha$ -GP<sub>1</sub> antibodies for 16 months. (B) Distance traveled in the open-  
862 field test by 18-month-old males ( $n \geq 8$  per group). Mean  $\pm$  SD, Kruskal-Wallis test followed  
863 by Dunnett’s multiple comparison tests. (C) Nuclei quantification in the hippocampal CA1  
864 region in 19-month-old mice ( $n \geq 4$  mice per group;  $n \geq 3$  matched sections per mouse).  
865 Mean  $\pm$  SD, one-way ANOVA followed by Dunnett’s multiple comparison tests. (D)  
866 Survival Kaplan–Meier curve of AAV-(G<sub>4</sub>C<sub>2</sub>)<sub>2</sub> and AAV-(G<sub>4</sub>C<sub>2</sub>)<sub>149</sub> mice receiving injections  
867 of <sup>ch</sup> $\alpha$ -GA<sub>1</sub> or IgG isotype control for 10 months. (E-G) Distance traveled (E), velocity of  
868 movement (F) and time spent moving (G) in the open-field test. (H) Time taken to fall from  
869 inverted grid by 9-month-old AAV-(G<sub>4</sub>C<sub>2</sub>) female mice. (I) Brain weights of AAV-(G<sub>4</sub>C<sub>2</sub>)  
870 mice treated for 10 months. Mean  $\pm$  SD, one-way ANOVA followed by Dunnett’s multiple  
871 comparison tests. Not significant (ns),  $P > 0.05$ , \*  $P \leq 0.05$ , \*\*  $P \leq 0.01$  and \*\*\*  $P \leq 0.001$ .

872

873

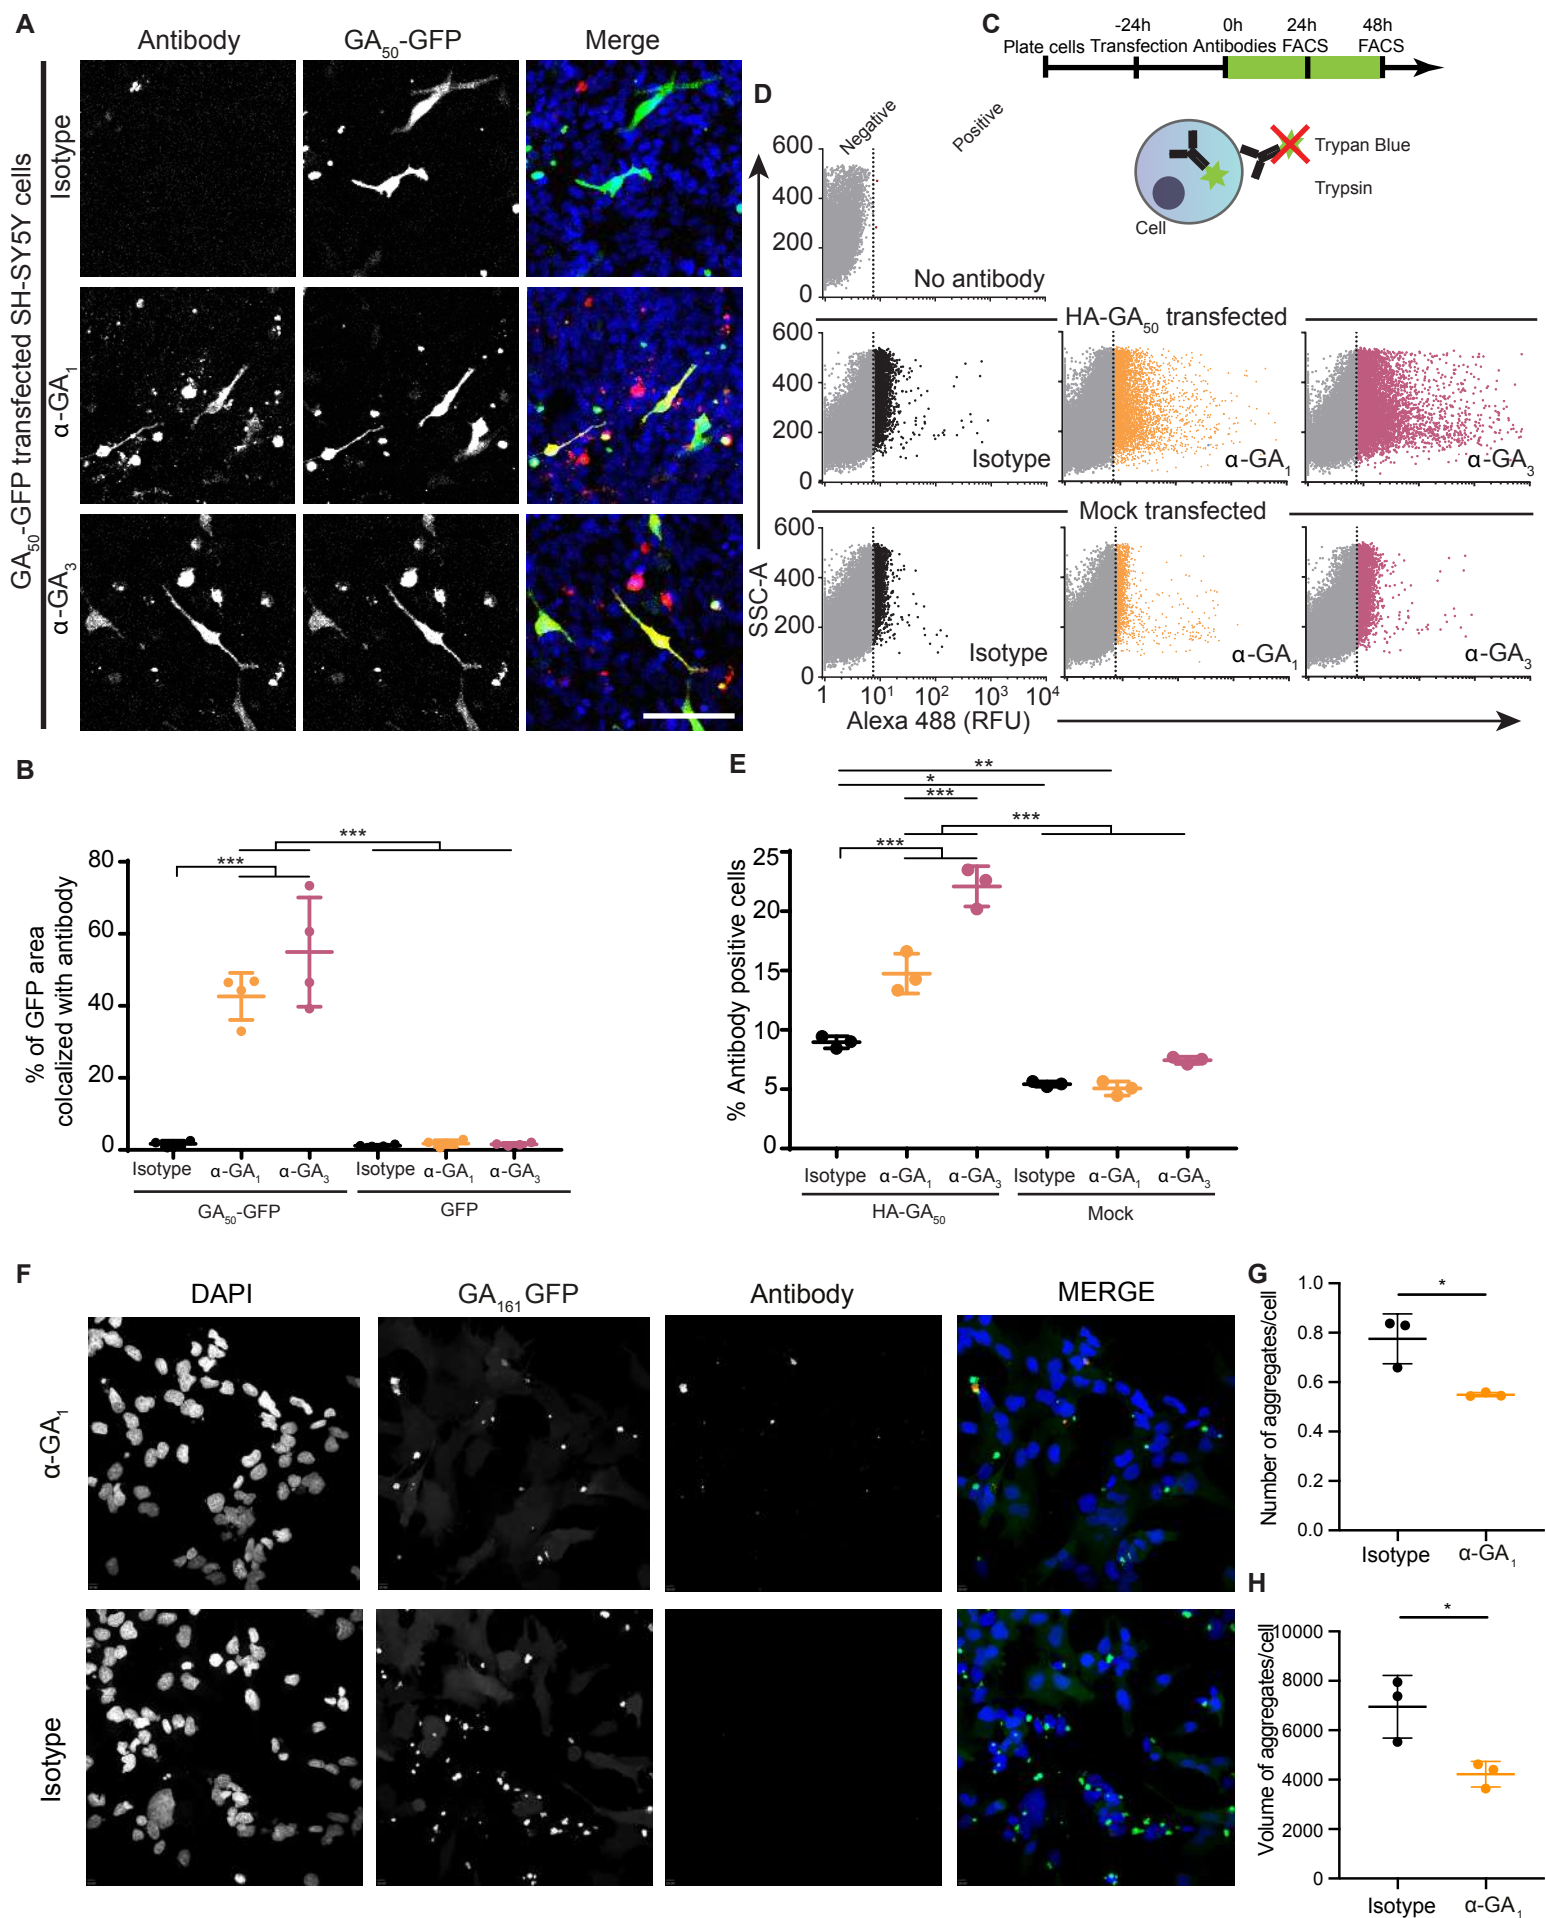

Figure 1. Antibody uptake and poly-GA colocalization in living cells

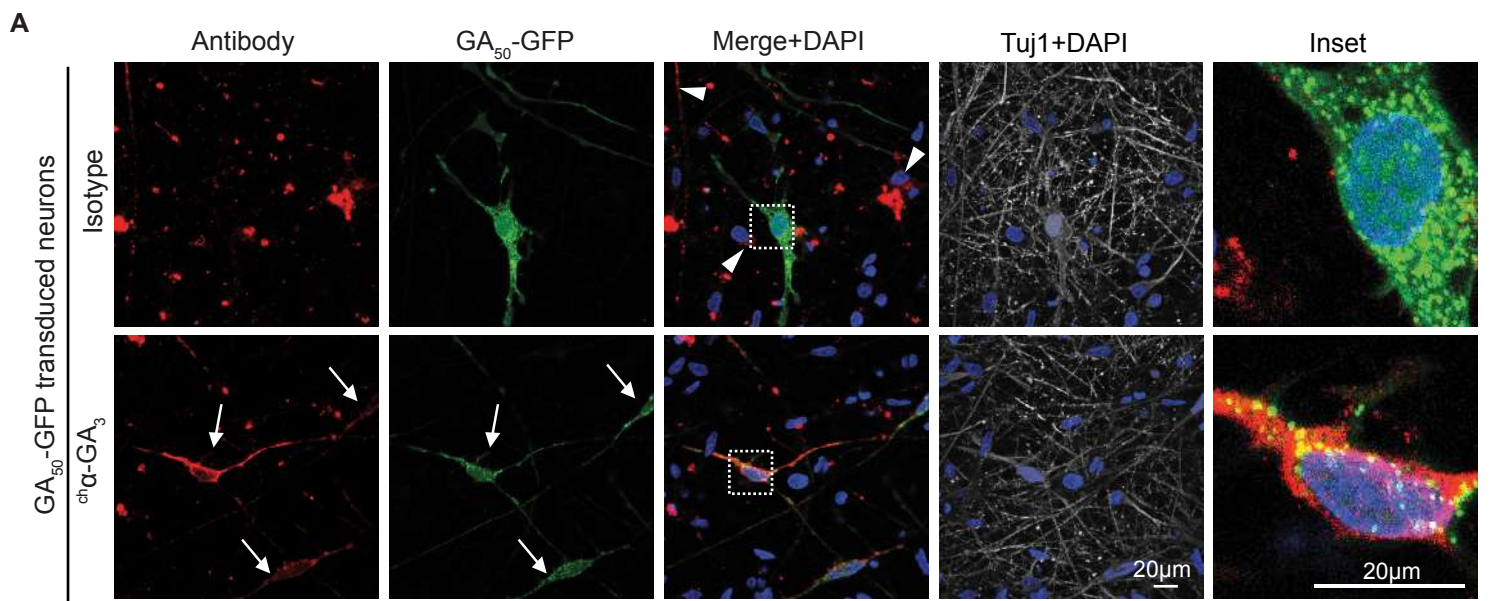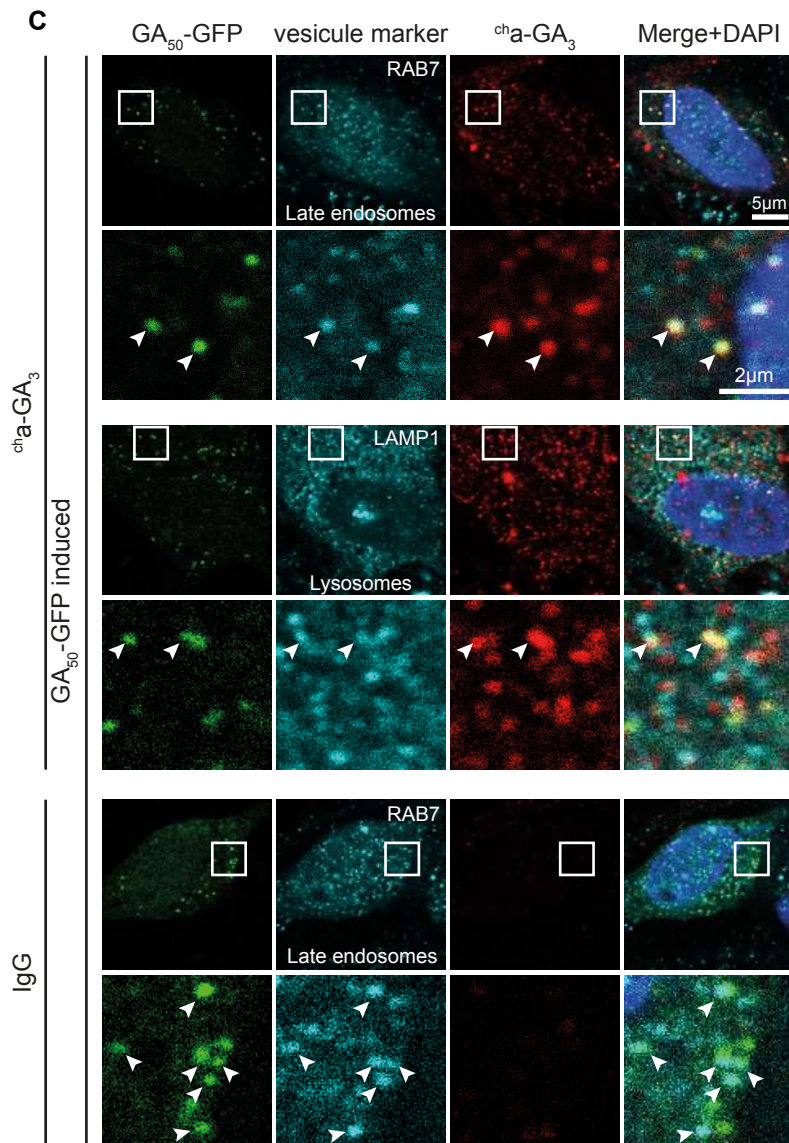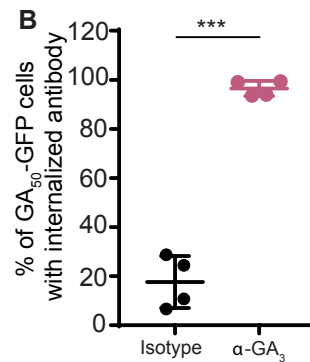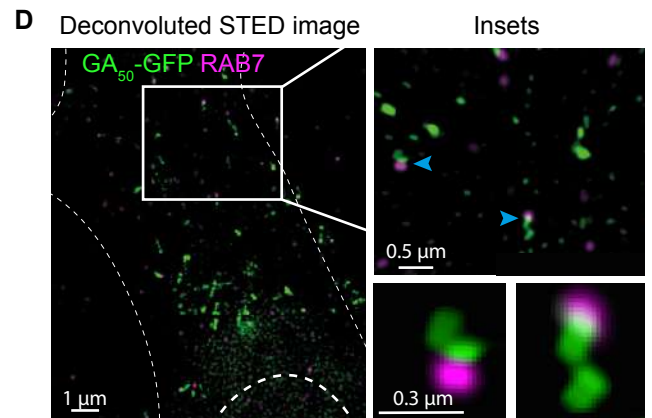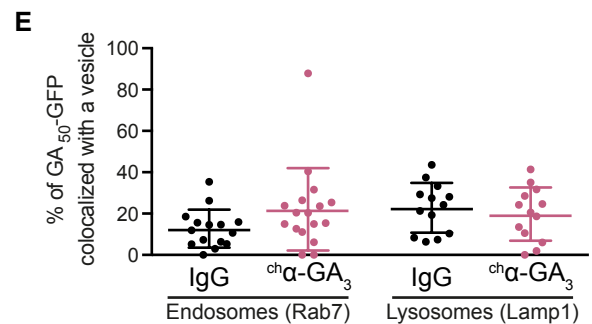

Figure 2. ch $\alpha$ -GA<sub>3</sub> is internalized via vesicular compartments in human neurons, but does not alter GA<sub>50</sub>-GFP vesicular localization

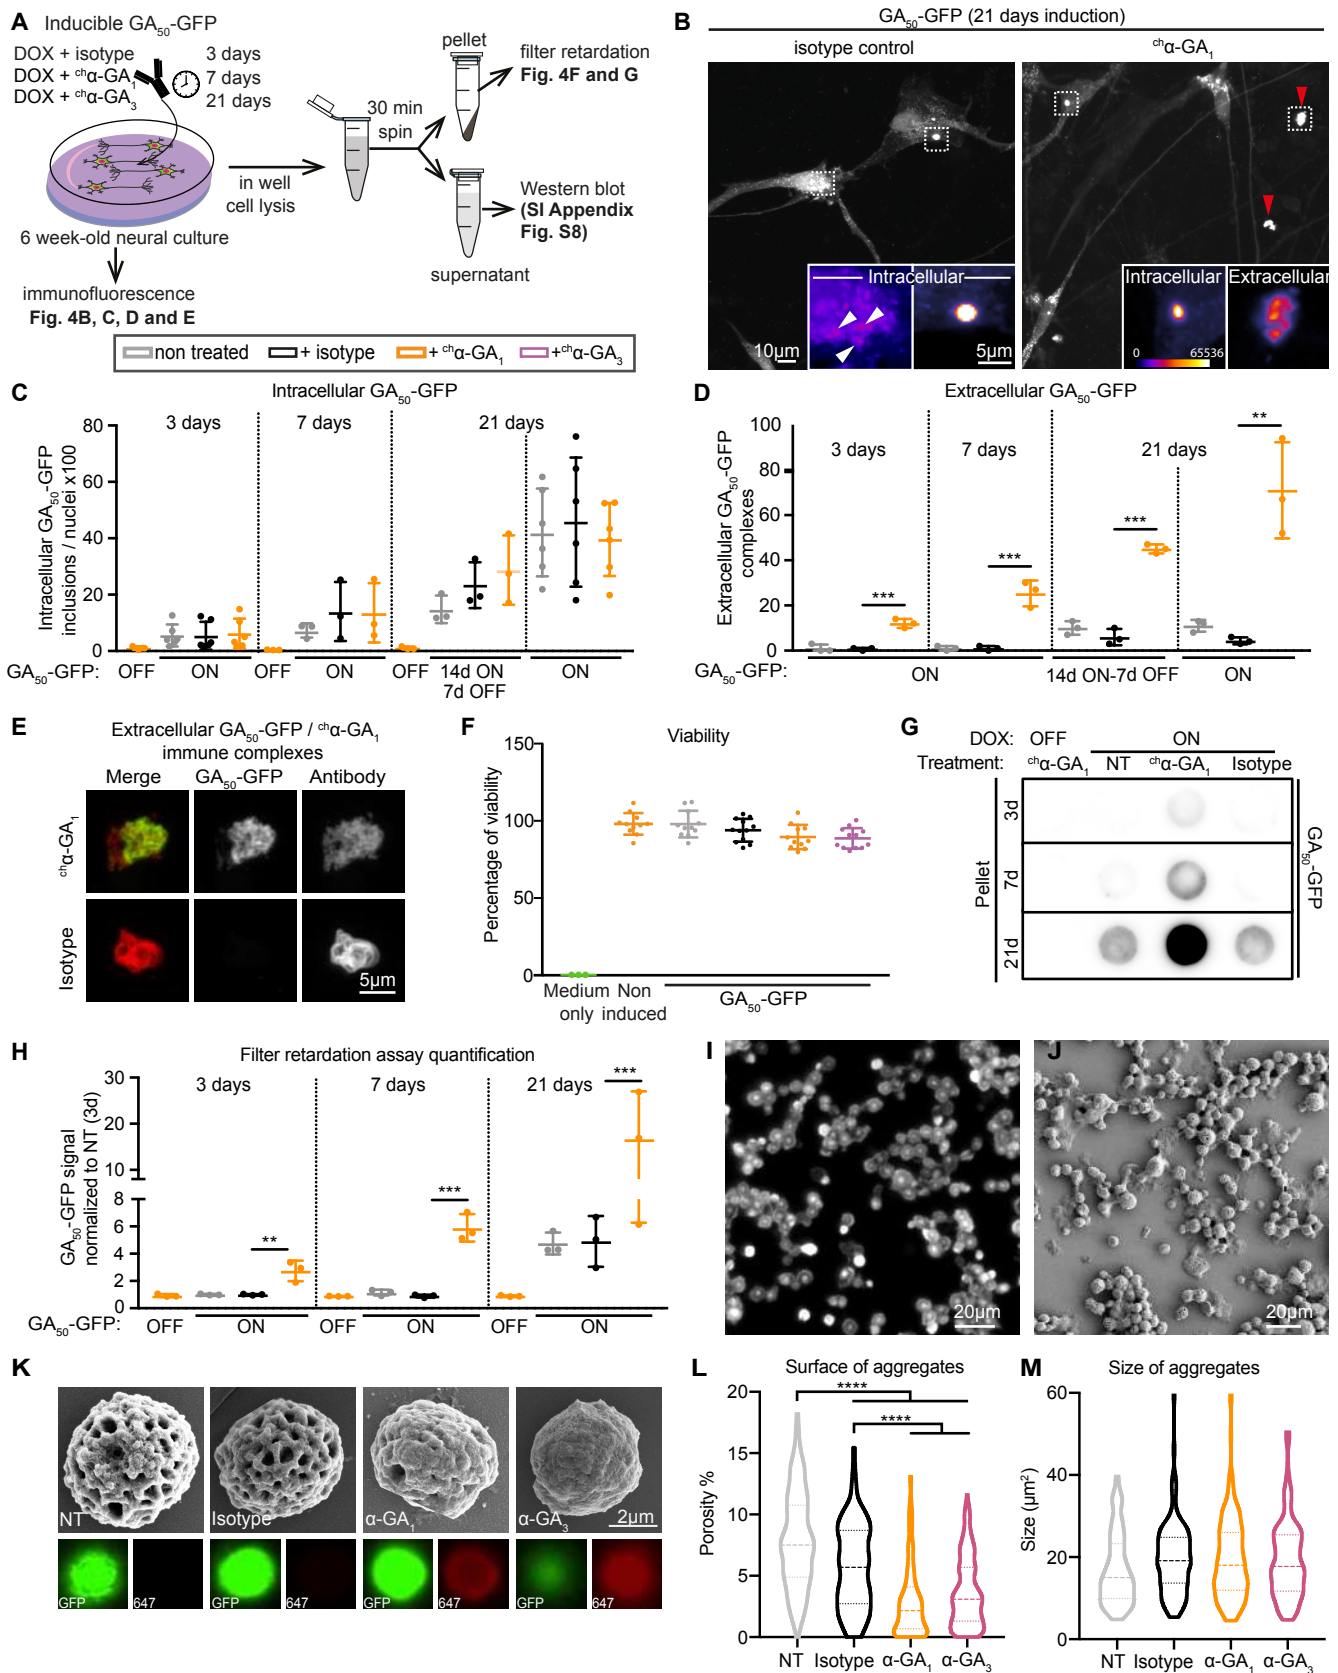

Figure 3. Poly-GA and antibodies form large hetero-complexes in long-term treated neuronal cultures

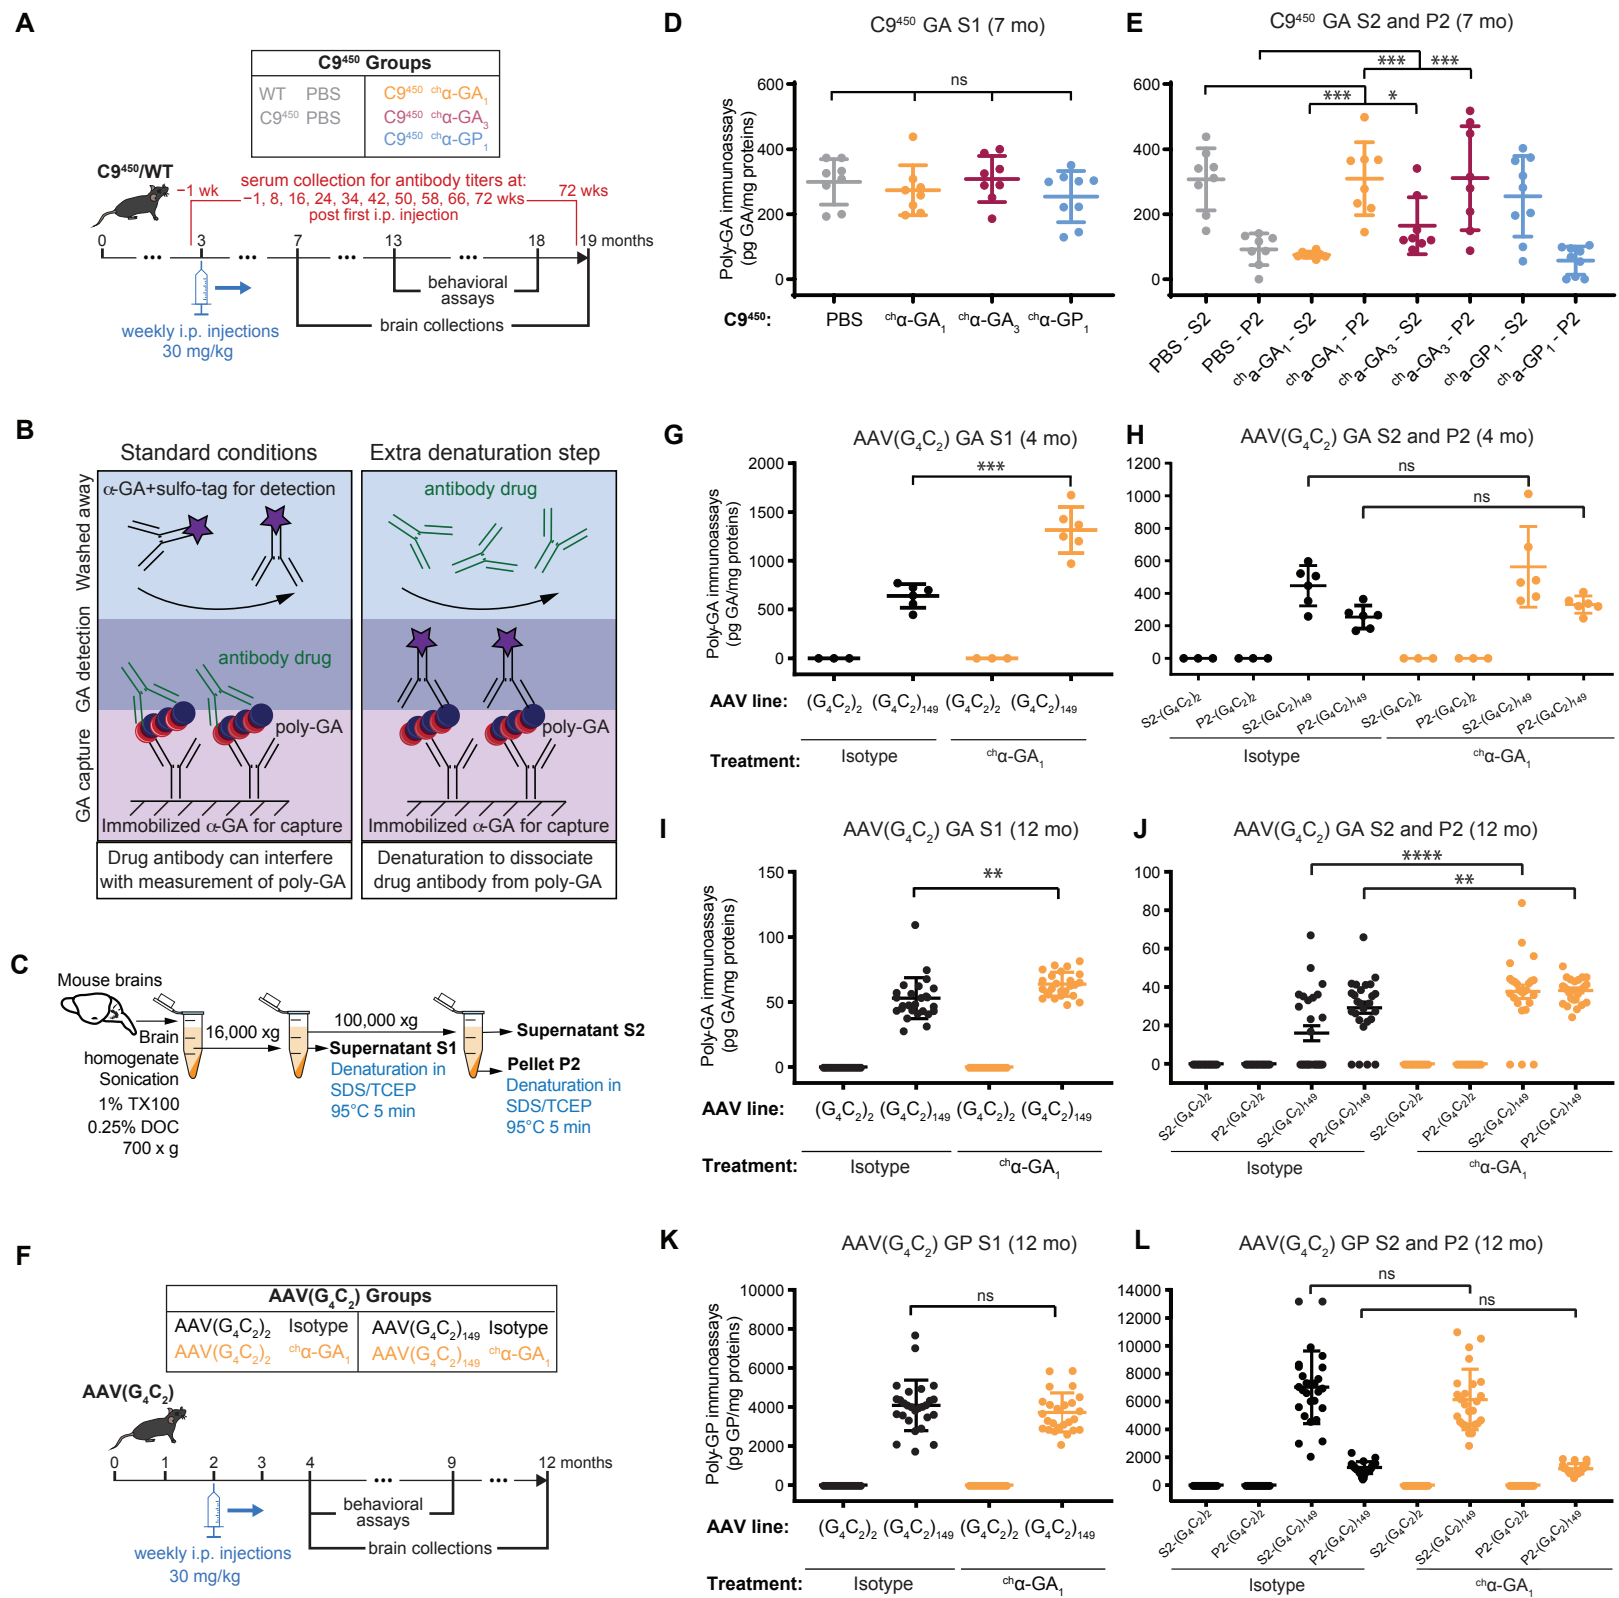

Figure 4. Immunoassay with samples denaturation identifies elevated levels of poly-GA in brains of mice treated with  $\alpha$ -GA antibodies

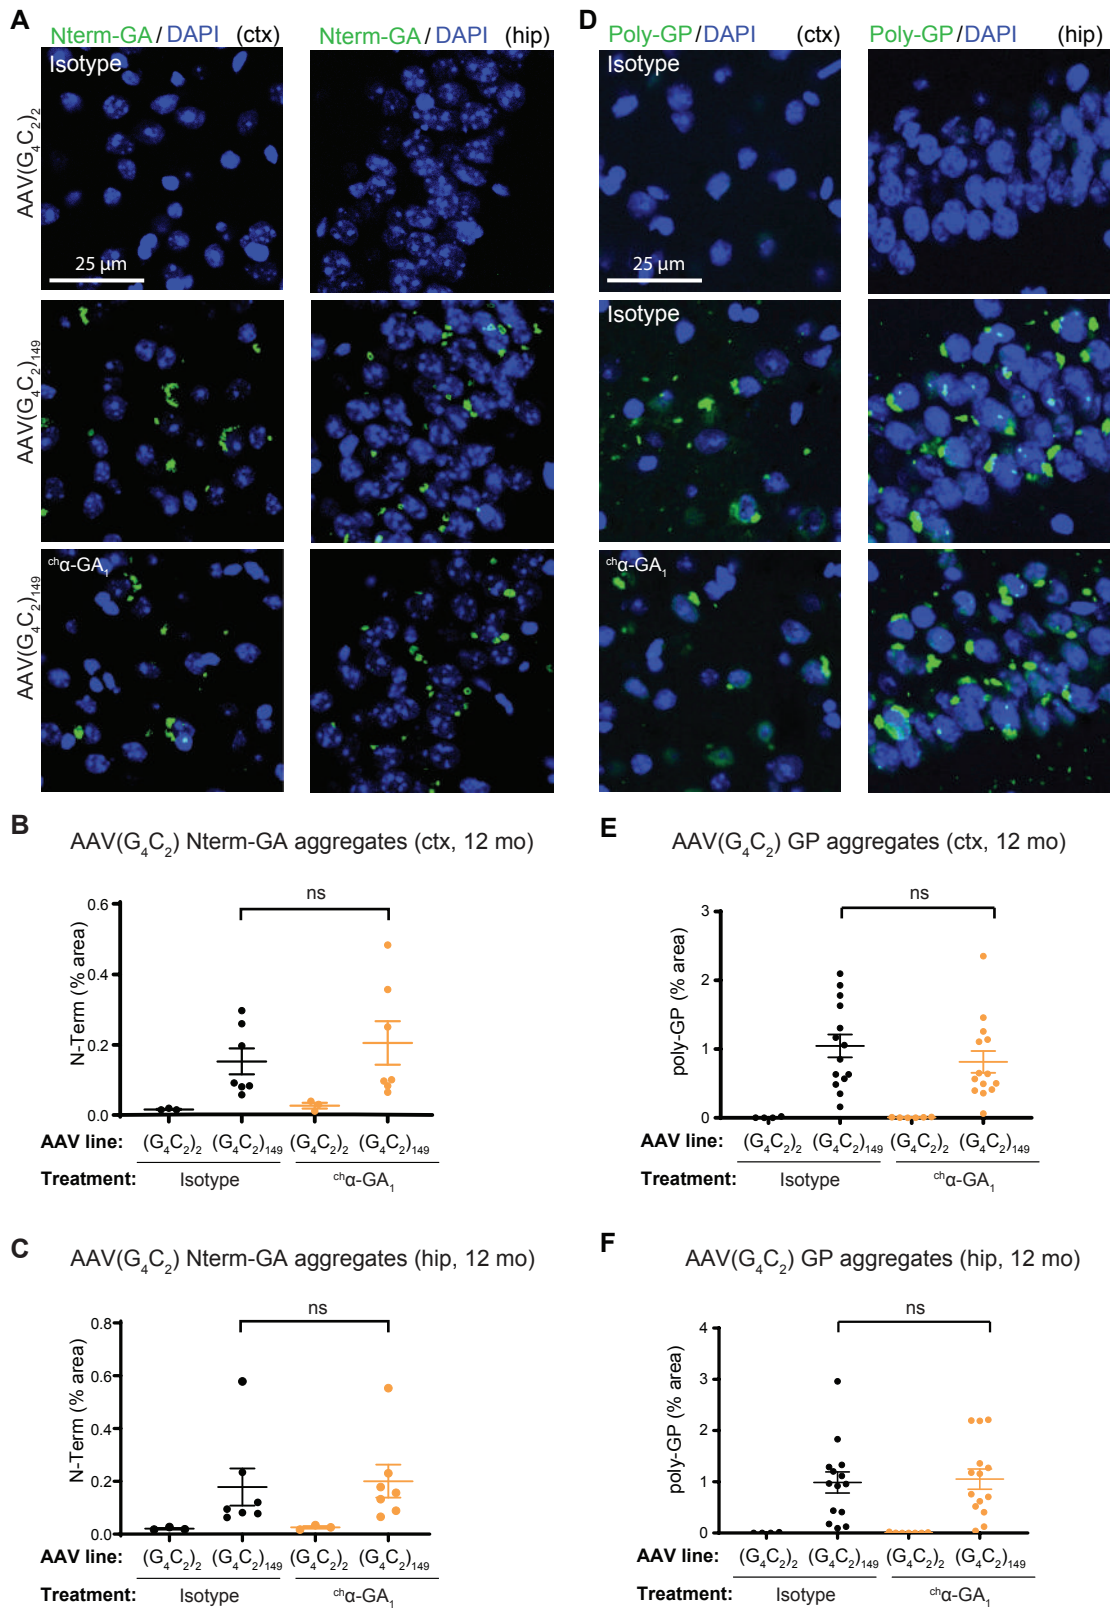

Figure 5. Chronic administration of human-derived  $\alpha$ -GA<sub>1</sub> antibody does not reduce the poly-GA and poly-GP aggregate load in brains of AAV(G<sub>4</sub>C<sub>2</sub>)<sub>149</sub> mice

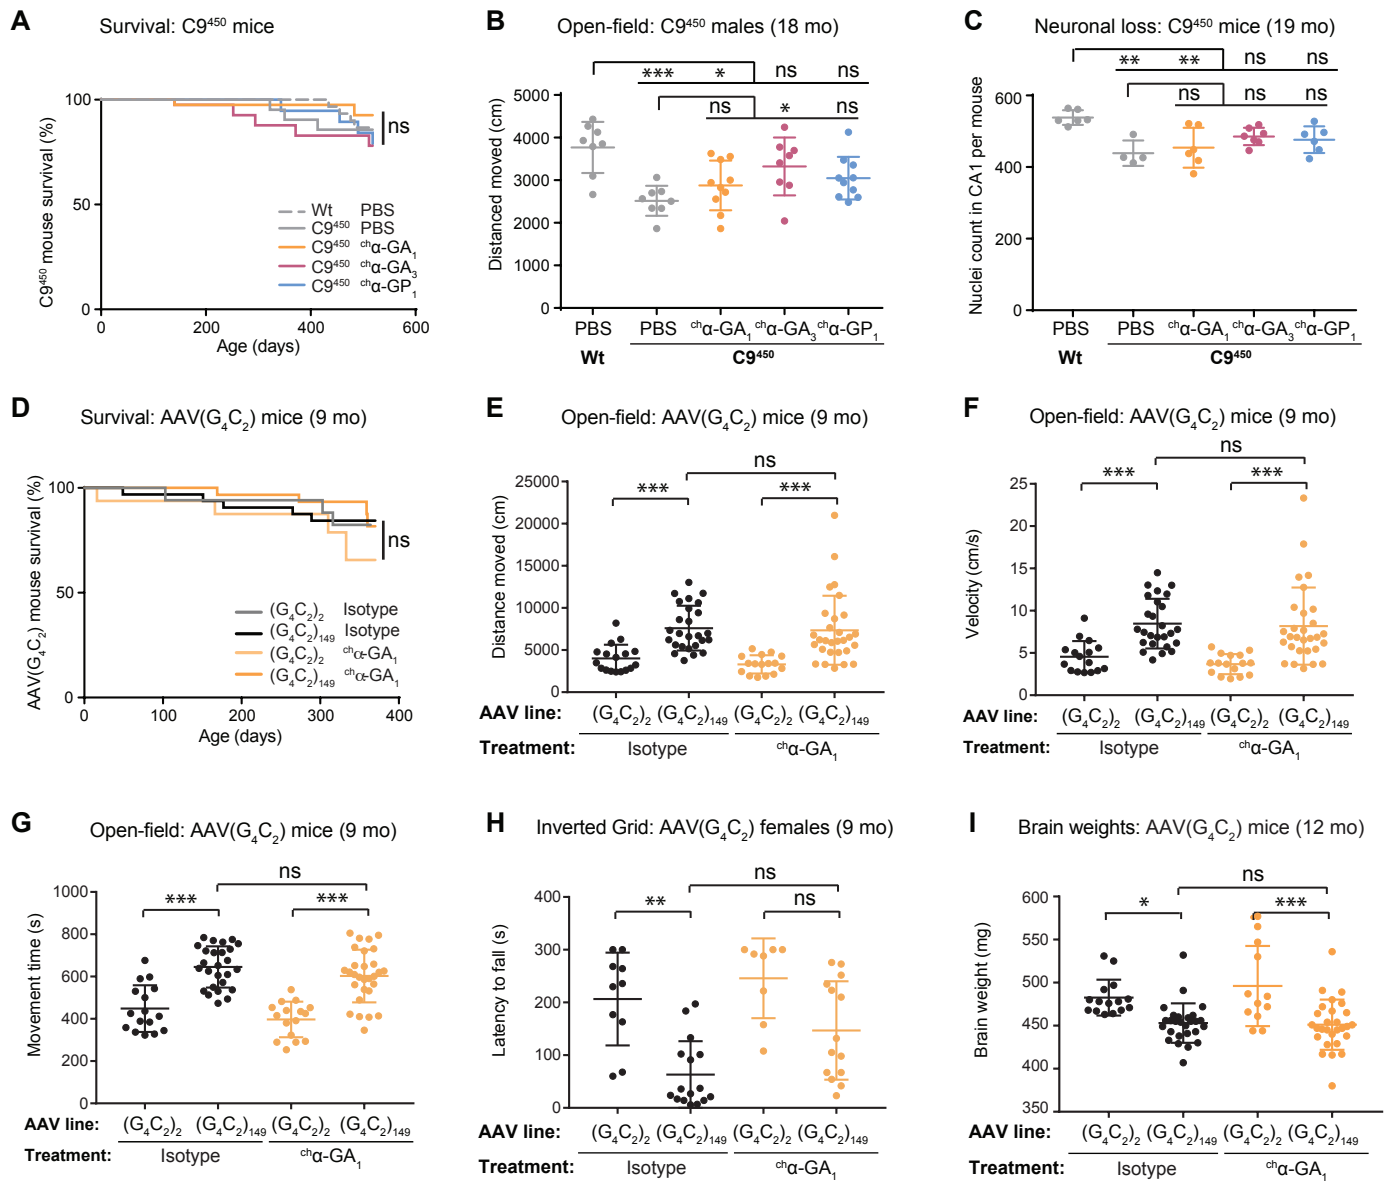

Figure 6. Chronic administration of  $\alpha$ -GA antibodies impacted only a subset of behavioral and neurodegeneration phenotypes in one of two C9ORF72 mouse models
